# Supplementary material for: An entirely solvent-free photooxygenation of olefins under continuous flow conditions
Source: Royal Society of Chemistry journal article supplement (doi:10.1039/d0gc00436g), 2020-01-01
Supplement: d0gc00436g1.zip [file d0gc00436g1.zip]

## Sheet: Data
blank		sample PrTPP		blank1_m2		blank_CF		PrTPP in CF
Wavelength (nm)	Abs	Wavelength (nm)	Abs	Wavelength (nm)	Abs	Wavelength (nm)	Abs	Wavelength (nm)	Abs			PROCEDURE
800	-0.00063364	800	-0.0013365	800	-0.00268229	800	-0.000416306	800	-0.000306175
799	-0.000769219	799	-0.0014004	799	-0.00278714	799	-0.000727821	799	-0.000633795
798	-0.000795523	798	-0.00140458	798	-0.00286552	798	-0.00103224	798	-0.000851331			3.37 mg nPrTPP
797	-0.000862595	797	-0.00153899	797	-0.00295799	797	-0.00120714	797	-0.0011157			diluted in 250 mL DCM
796	-0.00107196	796	-0.00173348	796	-0.00306647	796	-0.00147341	796	-0.00133145			taken 1 mL from this solution
795	-0.00111549	795	-0.00189455	795	-0.00318819	795	-0.00162018	795	-0.00159006			evaporated solvent, added 5 mL of methylcyclohexene (1-3) or Chloroform (CF) (4,5)
794	-0.00121251	794	-0.00193021	794	-0.00330951	794	-0.00190918	794	-0.00164906			M(Sens)= 783 g/mol
793	-0.00136634	793	-0.00205694	793	-0.00347163	793	-0.00203365	793	-0.00180588
792	-0.00151912	792	-0.00218898	792	-0.0036261	792	-0.00211959	792	-0.00203901			c=	3.44317e-06	mol/L
791	-0.00156535	791	-0.00230538	791	-0.0036916	791	-0.00232603	791	-0.00212217
790	-0.00170822	790	-0.00239622	790	-0.00385204	790	-0.0024077	790	-0.00230842
789	-0.00182691	789	-0.00249918	789	-0.00399878	789	-0.00261195	789	-0.0024931
788	-0.00195289	788	-0.00261869	788	-0.00402125	788	-0.00274135	788	-0.00267899
787	-0.00207291	787	-0.00269783	787	-0.00416387	787	-0.00284984	787	-0.00283261
786	-0.00214252	786	-0.00284639	786	-0.00425345	786	-0.00302128	786	-0.00286064
785	-0.00226789	785	-0.00283055	785	-0.00430256	785	-0.00314671	785	-0.00311582
784	-0.00228597	784	-0.00289736	784	-0.00438846	784	-0.0033501	784	-0.0033128
783	-0.00231161	783	-0.00292796	783	-0.0044723	783	-0.0034572	783	-0.00343039
782	-0.00232567	782	-0.00296087	782	-0.00443418	782	-0.00365402	782	-0.00358209
781	-0.0023923	781	-0.00303455	781	-0.0044989	781	-0.00375987	781	-0.00376449
780	-0.00245892	780	-0.00303496	780	-0.00456094	780	-0.00398359	780	-0.0040195
779	-0.002342	779	-0.00302041	779	-0.00453983	779	-0.00413541	779	-0.00406505
778	-0.00244791	778	-0.00301768	778	-0.00446052	778	-0.00422248	778	-0.00417228
777	-0.00234972	777	-0.00301033	777	-0.00451427	777	-0.0044104	777	-0.00441937
776	-0.00241197	776	-0.0030201	776	-0.00451001	776	-0.00464792	776	-0.00461217
775	-0.00238927	775	-0.0030713	775	-0.0046198	775	-0.00480402	775	-0.00478056
774	-0.00254288	774	-0.00321496	774	-0.00465028	774	-0.00496312	774	-0.00495442
773	-0.00266232	773	-0.00334486	773	-0.00479495	773	-0.00512693	773	-0.00514289
772	-0.00276332	772	-0.00342669	772	-0.00496973	772	-0.00535077	772	-0.00534929
771	-0.00279969	771	-0.00348704	771	-0.0050009	771	-0.00554566	771	-0.00542773
770	-0.00286614	770	-0.00352864	770	-0.00506451	770	-0.0056231	770	-0.00562642
769	-0.00294179	769	-0.00350882	769	-0.00506174	769	-0.00587829	769	-0.00588662
768	-0.00292878	768	-0.00355611	768	-0.00501062	768	-0.00601842	768	-0.00601087
767	-0.00284243	767	-0.0034026	767	-0.0050012	767	-0.00621435	767	-0.00619133
766	-0.00268573	766	-0.00330787	766	-0.00491639	766	-0.00636472	766	-0.00640253
765	-0.00264673	765	-0.0032812	765	-0.00483289	765	-0.00665666	765	-0.00659608
764	-0.00259296	764	-0.00326892	764	-0.00479157	764	-0.00678874	764	-0.00674954
763	-0.00253078	763	-0.00319374	763	-0.00473729	763	-0.00688944	763	-0.00685301
762	-0.00259105	762	-0.00320135	762	-0.00476233	762	-0.00712668	762	-0.00705181
761	-0.00265363	761	-0.0032701	761	-0.004878	761	-0.00734038	761	-0.00730928
760	-0.00274773	760	-0.00337116	760	-0.00496983	760	-0.0075673	760	-0.00747694
759	-0.00284037	759	-0.00348684	759	-0.00505688	759	-0.007669	759	-0.00758725
758	-0.00292271	758	-0.0035671	758	-0.00515548	758	-0.00785635	758	-0.00784201
757	-0.00306622	757	-0.00367749	757	-0.00523129	757	-0.00807675	757	-0.0079597
756	-0.00311243	756	-0.00374586	756	-0.00536585	756	-0.00827627	756	-0.00818305
755	-0.00337846	755	-0.00397677	755	-0.00554249	755	-0.00846132	755	-0.00837312
754	-0.00365202	754	-0.00426924	754	-0.00588953	754	-0.00857336	754	-0.00855204
753	-0.00411033	753	-0.00472971	753	-0.00635365	753	-0.00885768	753	-0.00870968
752	-0.00456212	752	-0.00519728	752	-0.00676646	752	-0.00905821	752	-0.00894162
751	-0.00498626	751	-0.00567445	751	-0.00724426	751	-0.00919843	751	-0.00904629
750	-0.00548764	750	-0.00618388	750	-0.00780001	750	-0.00934757	750	-0.00932041
749	-0.00605575	749	-0.00667455	749	-0.00831599	749	-0.00950943	749	-0.0093837
748	-0.00649914	748	-0.00719767	748	-0.00882354	748	-0.00967321	748	-0.00961999
747	-0.00696506	747	-0.0075789	747	-0.00922311	747	-0.00981303	747	-0.00974743
746	-0.00734613	746	-0.00799055	746	-0.00963619	746	-0.00994668	746	-0.00971913
745	-0.00778384	745	-0.00839054	745	-0.00998326	745	-0.0100093	745	-0.00986739
744	-0.00806918	744	-0.00872414	744	-0.0103138	744	-0.010149	744	-0.00996459
743	-0.00837373	743	-0.00895841	743	-0.0105445	743	-0.0101837	743	-0.010019
742	-0.00855514	742	-0.00922722	742	-0.0108182	742	-0.0103891	742	-0.0101459
741	-0.00885129	741	-0.00953253	741	-0.0110856	741	-0.0106177	741	-0.0104052
740	-0.0091671	740	-0.00980705	740	-0.0114577	740	-0.0108278	740	-0.0105591
739	-0.00958793	739	-0.0101961	739	-0.0118446	739	-0.0111074	739	-0.0107975
738	-0.010014	738	-0.0106686	738	-0.0122645	738	-0.0113682	738	-0.0110832
737	-0.010351	737	-0.0109604	737	-0.0126565	737	-0.0116205	737	-0.011316
736	-0.0106613	736	-0.011242	736	-0.0129206	736	-0.0119174	736	-0.0115709
735	-0.0109213	735	-0.011533	735	-0.0131814	735	-0.0121149	735	-0.0117215
734	-0.0111538	734	-0.0117628	734	-0.0134364	734	-0.0123862	734	-0.0120413
733	-0.0113231	733	-0.0119283	733	-0.0136189	733	-0.0126884	733	-0.0122481
732	-0.011451	732	-0.0120667	732	-0.0137668	732	-0.0128902	732	-0.0124269
731	-0.0116286	731	-0.0122287	731	-0.0139227	731	-0.0131237	731	-0.0126213
730	-0.0118824	730	-0.0124419	730	-0.0141269	730	-0.0133744	730	-0.0128311
729	-0.0120743	729	-0.012668	729	-0.0143703	729	-0.0135201	729	-0.0129071
728	-0.0123405	728	-0.0129712	728	-0.0146566	728	-0.0137166	728	-0.0130902
727	-0.0126984	727	-0.0132788	727	-0.0149751	727	-0.0138525	727	-0.0131387
726	-0.0130016	726	-0.0136374	726	-0.0152962	726	-0.0138798	726	-0.0131567
725	-0.0132913	725	-0.0139367	725	-0.0156474	725	-0.0138318	725	-0.0130024
724	-0.013611	724	-0.0141907	724	-0.0159334	724	-0.0136384	724	-0.0127952
723	-0.0138696	723	-0.0144973	723	-0.0162088	723	-0.0136071	723	-0.012659
722	-0.0142164	722	-0.0147793	722	-0.0165329	722	-0.0138303	722	-0.0127291
721	-0.0144796	721	-0.0150926	721	-0.0167993	721	-0.0141518	721	-0.0129352
720	-0.0147177	720	-0.0152748	720	-0.017053	720	-0.014505	720	-0.0132115
719	-0.0149453	719	-0.0155445	719	-0.0172633	719	-0.0148178	719	-0.0133952
718	-0.015218	718	-0.0157626	718	-0.0174915	718	-0.0152165	718	-0.0136212
717	-0.0154247	717	-0.0160313	717	-0.017763	717	-0.0155429	717	-0.0137564
716	-0.0156446	716	-0.0161692	716	-0.0179752	716	-0.0157356	716	-0.013831
715	-0.0159116	715	-0.0164446	715	-0.018183	715	-0.0160209	715	-0.0139261
714	-0.0161382	714	-0.0166905	714	-0.0184716	714	-0.0162637	714	-0.0139152
713	-0.0163164	713	-0.0168237	713	-0.0186137	713	-0.0164518	713	-0.0139473
712	-0.0165605	712	-0.0171373	712	-0.0188599	712	-0.0167097	712	-0.0138859
711	-0.0167313	711	-0.0173457	711	-0.0190805	711	-0.0169027	711	-0.0138656
710	-0.0169164	710	-0.0175241	710	-0.0193052	710	-0.0170975	710	-0.0137714
709	-0.017115	709	-0.0177356	709	-0.0194955	709	-0.0173141	709	-0.0135915
708	-0.0173778	708	-0.0178693	708	-0.0196658	708	-0.0175418	708	-0.0134283
707	-0.0175306	707	-0.0181053	707	-0.0199159	707	-0.0176935	707	-0.0132492
706	-0.0177734	706	-0.0183035	706	-0.0201047	706	-0.0179408	706	-0.0130887
705	-0.0179235	705	-0.0184359	705	-0.0202955	705	-0.0181042	705	-0.0127628
704	-0.0181282	704	-0.0186812	704	-0.0204699	704	-0.0182425	704	-0.0124048
703	-0.0183758	703	-0.0188684	703	-0.0207124	703	-0.0185027	703	-0.0120896
702	-0.0185309	702	-0.0190369	702	-0.0208581	702	-0.0186504	702	-0.0117076
701	-0.0187151	701	-0.0192354	701	-0.0210599	701	-0.0188288	701	-0.0112881
700	-0.0188678	700	-0.0193658	700	-0.021267	700	-0.01902	700	-0.0108109
699	-0.0191138	699	-0.0195791	699	-0.0214864	699	-0.0191975	699	-0.0102805
698	-0.0192715	698	-0.0197616	698	-0.0216364	698	-0.0194001	698	-0.00977532
697	-0.0194501	697	-0.0198985	697	-0.0218138	697	-0.0195627	697	-0.00911342
696	-0.019643	696	-0.020097	696	-0.0219976	696	-0.0197198	696	-0.00848716
695	-0.0198154	695	-0.0203097	695	-0.0221899	695	-0.0199575	695	-0.00785965
694	-0.0200348	694	-0.0204866	694	-0.0223967	694	-0.0201007	694	-0.00709495
693	-0.0202283	693	-0.020654	693	-0.0225801	693	-0.0202852	693	-0.00637381
692	-0.0204051	692	-0.0208299	692	-0.0227649	692	-0.0204361	692	-0.00558793
691	-0.0205728	691	-0.0209647	691	-0.0229699	691	-0.020598	691	-0.00475537
690	-0.0207499	690	-0.0211701	690	-0.0231543	690	-0.0207673	690	-0.00391839
689	-0.0209569	689	-0.0212737	689	-0.0233232	689	-0.020945	689	-0.00304416
688	-0.0211286	688	-0.0215118	688	-0.023456	688	-0.0211194	688	-0.00215844
687	-0.021338	687	-0.0216622	687	-0.0237233	687	-0.021287	687	-0.00125392
686	-0.0215208	686	-0.0218315	686	-0.0238726	686	-0.0214091	686	-0.000339853
685	-0.0217074	685	-0.0219847	685	-0.024079	685	-0.0215672	685	0.00052373
684	-0.0218585	684	-0.022202	684	-0.0242537	684	-0.0217969	684	0.00139462
683	-0.0220403	683	-0.0223247	683	-0.024431	683	-0.0219007	683	0.00223418
682	-0.0222262	682	-0.0224646	682	-0.0246804	682	-0.0221245	682	0.00299787
681	-0.0224176	681	-0.0226325	681	-0.0248254	681	-0.0222105	681	0.00375351
680	-0.0226202	680	-0.0228052	680	-0.0250381	680	-0.0224724	680	0.00441482
679	-0.022772	679	-0.0228957	679	-0.0252272	679	-0.0226564	679	0.00504035
678	-0.0229493	678	-0.0230258	678	-0.0253743	678	-0.0228207	678	0.00561472
677	-0.0231098	677	-0.0231372	677	-0.0255771	677	-0.023032	677	0.00602971
676	-0.0233233	676	-0.0232732	676	-0.0257288	676	-0.0231595	676	0.00641651
675	-0.0234585	675	-0.023335	675	-0.0259042	675	-0.0233308	675	0.00667957
674	-0.0236555	674	-0.0234623	674	-0.0260751	674	-0.0234918	674	0.00692003
673	-0.0238061	673	-0.0234866	673	-0.0262451	673	-0.0235908	673	0.00698321
672	-0.0239637	672	-0.023503	672	-0.0264453	672	-0.0238131	672	0.00695299
671	-0.0241424	671	-0.0235296	671	-0.0266207	671	-0.0239283	671	0.00684984
670	-0.0242994	670	-0.0234652	670	-0.0267899	670	-0.0240755	670	0.00672158
669	-0.0244337	669	-0.0234017	669	-0.0269204	669	-0.0242737	669	0.00640482
668	-0.0246047	668	-0.0233144	668	-0.0271276	668	-0.0244011	668	0.00608843
667	-0.0247605	667	-0.0231467	667	-0.0272384	667	-0.0245489	667	0.00571346
666	-0.0248764	666	-0.0229275	666	-0.0273993	666	-0.0247198	666	0.00519614
665	-0.0250675	665	-0.0226386	665	-0.0275785	665	-0.0249448	665	0.00470925
664	-0.0251725	664	-0.0222584	664	-0.0277548	664	-0.0250556	664	0.00422344
663	-0.0253359	663	-0.0217443	663	-0.0278677	663	-0.0252413	663	0.00374051
662	-0.0254647	662	-0.0210944	662	-0.0280325	662	-0.0253265	662	0.00336352
661	-0.0256509	661	-0.0203352	661	-0.0282025	661	-0.0255422	661	0.00292125
660	-0.0257711	660	-0.019291	660	-0.0283178	660	-0.0257149	660	0.00260567
659	-0.0258491	659	-0.0180357	659	-0.028445	659	-0.0258266	659	0.00249938
658	-0.0259938	658	-0.01654	658	-0.0285389	658	-0.0259409	658	0.0024414
657	-0.0261343	657	-0.0148137	657	-0.0287041	657	-0.0260935	657	0.00248295
656	-0.0262168	656	-0.0129147	656	-0.0288399	656	-0.0261628	656	0.0025821
655	-0.0263532	655	-0.0109331	655	-0.0289245	655	-0.0263344	655	0.0027013
654	-0.0264142	654	-0.00911489	654	-0.0290007	654	-0.0264491	654	0.00283685
653	-0.0265183	653	-0.00777895	653	-0.0290841	653	-0.0265632	653	0.00285316
652	-0.0265545	652	-0.00715536	652	-0.0291966	652	-0.0266657	652	0.00276353
651	-0.0266197	651	-0.00721993	651	-0.0292192	651	-0.0267646	651	0.00253169
650	-0.0266805	650	-0.00794826	650	-0.0292978	650	-0.0268406	650	0.00208681
649	-0.0267299	649	-0.0090977	649	-0.029381	649	-0.0269294	649	0.00137293
648	-0.0268375	648	-0.0104425	648	-0.0294413	648	-0.0269952	648	0.000474723
647	-0.0268805	647	-0.0120058	647	-0.0295355	647	-0.0270443	647	-0.000728596
646	-0.02694	646	-0.0136308	646	-0.0295721	646	-0.0271154	646	-0.00208651
645	-0.0270251	645	-0.0152681	645	-0.029638	645	-0.0271615	645	-0.00366332
644	-0.0270383	644	-0.0169038	644	-0.0297008	644	-0.0272001	644	-0.00533686
643	-0.0271019	643	-0.0184291	643	-0.0297348	643	-0.0271937	643	-0.00707193
642	-0.0271343	642	-0.0196759	642	-0.029776	642	-0.0272028	642	-0.00877778
641	-0.0271861	641	-0.0207855	641	-0.0298421	641	-0.0272048	641	-0.0104456
640	-0.027224	640	-0.0216793	640	-0.0298608	640	-0.0271894	640	-0.0119577
639	-0.0272295	639	-0.0223598	639	-0.0298951	639	-0.0271772	639	-0.0133176
638	-0.0272547	638	-0.0229932	638	-0.0299234	638	-0.0271426	638	-0.0145321
637	-0.0273139	637	-0.0235281	637	-0.0299108	637	-0.027144	637	-0.0155912
636	-0.0272998	636	-0.0240387	636	-0.0299075	636	-0.0270636	636	-0.0164947
635	-0.0272726	635	-0.0243862	635	-0.0298743	635	-0.0270416	635	-0.0172995
634	-0.0272644	634	-0.0247663	634	-0.0299267	634	-0.0270393	634	-0.0179487
633	-0.0273188	633	-0.0250811	633	-0.0298794	633	-0.026973	633	-0.0184375
632	-0.0272324	632	-0.0252488	632	-0.0298638	632	-0.0269408	632	-0.0189037
631	-0.0271952	631	-0.0254311	631	-0.0298233	631	-0.0268807	631	-0.0192943
630	-0.0272136	630	-0.0256004	630	-0.0298092	630	-0.0268862	630	-0.0196402
629	-0.027176	629	-0.0257394	629	-0.0298068	629	-0.0268364	629	-0.0198557
628	-0.027164	628	-0.0257877	628	-0.0298109	628	-0.0267957	628	-0.0200752
627	-0.027145	627	-0.0257948	627	-0.029799	627	-0.0267167	627	-0.0201426
626	-0.0271501	626	-0.0257873	626	-0.0297626	626	-0.0266275	626	-0.020206
625	-0.0271044	625	-0.0257058	625	-0.0297645	625	-0.0266094	625	-0.0202261
624	-0.0270505	624	-0.0255892	624	-0.0297325	624	-0.0265467	624	-0.0201928
623	-0.0270251	623	-0.0254154	623	-0.0296944	623	-0.0265347	623	-0.0201863
622	-0.0270172	622	-0.0252548	622	-0.0296635	622	-0.0264813	622	-0.0200631
621	-0.0269759	621	-0.025036	621	-0.0296668	621	-0.0264805	621	-0.0199354
620	-0.0270066	620	-0.0247902	620	-0.029647	620	-0.0264413	620	-0.0198592
619	-0.0269844	619	-0.0245023	619	-0.0296461	619	-0.02642	619	-0.0196278
618	-0.0270095	618	-0.0241825	618	-0.0296461	618	-0.0263621	618	-0.0194475
617	-0.0269757	617	-0.0238382	617	-0.0296735	617	-0.0263356	617	-0.0191672
616	-0.0269633	616	-0.0234015	616	-0.0296744	616	-0.0262618	616	-0.0189205
615	-0.026969	615	-0.0229817	615	-0.0296604	615	-0.0262886	615	-0.0187018
614	-0.0270453	614	-0.0225886	614	-0.0297008	614	-0.0263223	614	-0.0184556
613	-0.0270629	613	-0.0221362	613	-0.0297039	613	-0.0263442	613	-0.0182015
612	-0.0270957	612	-0.021704	612	-0.0297948	612	-0.0264019	612	-0.0179385
611	-0.0271572	611	-0.0212093	611	-0.0298656	611	-0.0264778	611	-0.0176928
610	-0.027211	610	-0.0206944	610	-0.0298792	610	-0.026508	610	-0.0173812
609	-0.0272816	609	-0.0202049	609	-0.0300157	609	-0.0265566	609	-0.0170864
608	-0.0273088	608	-0.0196202	608	-0.0300687	608	-0.0266481	608	-0.0167635
607	-0.0274158	607	-0.0190229	607	-0.0301863	607	-0.0267389	607	-0.0163775
606	-0.0274994	606	-0.0182546	606	-0.0302601	606	-0.0268151	606	-0.0160268
605	-0.0275344	605	-0.0174002	605	-0.0303269	605	-0.0269113	605	-0.0155717
604	-0.0276143	604	-0.0164343	604	-0.0304079	604	-0.0270028	604	-0.015101
603	-0.0277442	603	-0.0153529	603	-0.0304762	603	-0.0270703	603	-0.0145542
602	-0.0277838	602	-0.0142324	602	-0.0305609	602	-0.0271658	602	-0.0139315
601	-0.0278152	601	-0.0131456	601	-0.0306363	601	-0.0272557	601	-0.013304
600	-0.0279083	600	-0.0121569	600	-0.0307179	600	-0.0272762	600	-0.0127136
599	-0.0279708	599	-0.0112367	599	-0.030763	599	-0.0273191	599	-0.0120802
598	-0.0280355	598	-0.0105132	598	-0.0307963	598	-0.0273499	598	-0.011507
597	-0.0280495	597	-0.00990817	597	-0.0308289	597	-0.0273736	597	-0.0109737
596	-0.0280847	596	-0.00947727	596	-0.0308589	596	-0.0274472	596	-0.0105717
595	-0.0280259	595	-0.00914373	595	-0.0309042	595	-0.0273567	595	-0.0101928
594	-0.0280027	594	-0.00888735	594	-0.0308501	594	-0.0273455	594	-0.00992184
593	-0.0279731	593	-0.0088143	593	-0.0308147	593	-0.0273279	593	-0.00979653
592	-0.0279309	592	-0.00891139	592	-0.0307469	592	-0.0272635	592	-0.00978575
591	-0.0278532	591	-0.009233	591	-0.030694	591	-0.0271657	591	-0.00987209
590	-0.0278142	590	-0.00980498	590	-0.0306532	590	-0.0271297	590	-0.0101813
589	-0.0277681	589	-0.0106515	589	-0.0305867	589	-0.0270436	589	-0.0106288
588	-0.0276976	588	-0.0117644	588	-0.0304916	588	-0.026966	588	-0.011199
587	-0.02765	587	-0.0131009	587	-0.0304499	587	-0.0268841	587	-0.0119252
586	-0.0275828	586	-0.0145018	586	-0.0303553	586	-0.0268221	586	-0.0127243
585	-0.0275335	585	-0.0157903	585	-0.0303113	585	-0.0267306	585	-0.0135977
584	-0.0274964	584	-0.016956	584	-0.0302914	584	-0.0267062	584	-0.0144916
583	-0.0274262	583	-0.0179604	583	-0.0301903	583	-0.0265755	583	-0.0153687
582	-0.0274256	582	-0.0187831	582	-0.0301944	582	-0.0265668	582	-0.0161419
581	-0.027351	581	-0.0194828	581	-0.0301495	581	-0.026502	581	-0.0168751
580	-0.0273599	580	-0.020137	580	-0.0301578	580	-0.0264778	580	-0.0174666
579	-0.0273879	579	-0.0205478	579	-0.0301337	579	-0.0264262	579	-0.0179421
578	-0.0273385	578	-0.021043	578	-0.0300797	578	-0.0263731	578	-0.0183763
577	-0.0272941	577	-0.0213621	577	-0.0300131	577	-0.0263653	577	-0.0186064
576	-0.0272884	576	-0.0216842	576	-0.0300038	576	-0.0263154	576	-0.0188062
575	-0.02728	575	-0.0219233	575	-0.0299994	575	-0.0262891	575	-0.0188796
574	-0.0272767	574	-0.0220604	574	-0.0299747	574	-0.0263163	574	-0.0188726
573	-0.0272411	573	-0.0220858	573	-0.0299732	573	-0.0262718	573	-0.0186732
572	-0.0272553	572	-0.021998	572	-0.0299727	572	-0.0262887	572	-0.0184286
571	-0.0272554	571	-0.0218178	571	-0.0299433	571	-0.0262425	571	-0.0179646
570	-0.0272431	570	-0.0214304	570	-0.029966	570	-0.0262515	570	-0.0173718
569	-0.0271814	569	-0.0209207	569	-0.0298898	569	-0.0261827	569	-0.0166122
568	-0.0272256	568	-0.0203514	568	-0.0299424	568	-0.0262111	568	-0.0157275
567	-0.0272962	567	-0.0196291	567	-0.0299101	567	-0.0262248	567	-0.0146434
566	-0.0272415	566	-0.0187836	566	-0.0299543	566	-0.0262504	566	-0.0134525
565	-0.0272881	565	-0.0177704	565	-0.029952	565	-0.0262907	565	-0.0120521
564	-0.0273343	564	-0.0165845	564	-0.0299656	564	-0.0262749	564	-0.0104612
563	-0.0273815	563	-0.0152002	563	-0.0300281	563	-0.0263396	563	-0.00888324
562	-0.0274155	562	-0.013539	562	-0.0301108	562	-0.0263756	562	-0.00707677
561	-0.0274559	561	-0.0117343	561	-0.0300937	561	-0.0263952	561	-0.00521753
560	-0.0275175	560	-0.00970004	560	-0.0301982	560	-0.0264103	560	-0.00336757
559	-0.0275444	559	-0.00743052	559	-0.0302071	559	-0.0264362	559	-0.00153821
558	-0.0275985	558	-0.00500059	558	-0.0302722	558	-0.026462	558	9.54521e-05
557	-0.0276531	557	-0.00251467	557	-0.0302968	557	-0.0265306	557	0.00159993
556	-0.0276868	556	-1.17003e-05	556	-0.0303599	556	-0.0265257	556	0.00278247
555	-0.0277338	555	0.00243257	555	-0.0303721	555	-0.0265605	555	0.00365229
554	-0.0277706	554	0.00466578	554	-0.0304311	554	-0.0265781	554	0.00406515
553	-0.0277791	553	0.00663601	553	-0.0304603	553	-0.0266217	553	0.0041032
552	-0.0278642	552	0.00816046	552	-0.0304966	552	-0.026635	552	0.00375168
551	-0.0278933	551	0.00926463	551	-0.0305398	551	-0.0266556	551	0.00302308
550	-0.0279118	550	0.00983731	550	-0.0305998	550	-0.026741	550	0.00198018
549	-0.0279523	549	0.00979846	549	-0.0306726	549	-0.0267673	549	0.000707366
548	-0.0280271	548	0.00926989	548	-0.0307065	548	-0.0267407	548	-0.000712884
547	-0.0280795	547	0.00811298	547	-0.0307348	547	-0.0267989	547	-0.00225883
546	-0.0280404	546	0.00646394	546	-0.0307571	546	-0.0267973	546	-0.00387985
545	-0.0281305	545	0.00433458	545	-0.0307944	545	-0.0268383	545	-0.00546633
544	-0.0281438	544	0.00192625	544	-0.0308099	544	-0.026874	544	-0.00699593
543	-0.0281705	543	-0.000803998	543	-0.0308835	543	-0.0269046	543	-0.00845594
542	-0.0282766	542	-0.00354035	542	-0.03096	542	-0.0269501	542	-0.00980351
541	-0.0283557	541	-0.00615295	541	-0.0310435	541	-0.0270045	541	-0.0108699
540	-0.0284253	540	-0.00857458	540	-0.0310936	540	-0.0270565	540	-0.0117269
539	-0.0285018	539	-0.0106187	539	-0.0311913	539	-0.0271399	539	-0.0123517
538	-0.0285901	538	-0.012178	538	-0.0312611	538	-0.0272321	538	-0.0126368
537	-0.0286276	537	-0.0131485	537	-0.0312896	537	-0.0272523	537	-0.0125508
536	-0.028695	536	-0.0135959	536	-0.0313804	536	-0.0273228	536	-0.0121103
535	-0.02875	535	-0.013479	535	-0.0314754	535	-0.0273657	535	-0.0113967
534	-0.0289063	534	-0.0129598	534	-0.0315474	534	-0.0274234	534	-0.0102716
533	-0.0289307	533	-0.0119649	533	-0.0316274	533	-0.0274692	533	-0.00881963
532	-0.0290034	532	-0.0105739	532	-0.0316834	532	-0.0275518	532	-0.00697142
531	-0.0290592	531	-0.00874084	531	-0.0317585	531	-0.0275827	531	-0.00491905
530	-0.0291253	530	-0.00655447	530	-0.0318635	530	-0.0277086	530	-0.00255791
529	-0.0291891	529	-0.00387452	529	-0.0319147	529	-0.0277172	529	7.36777e-05
528	-0.0292691	528	-0.000885536	528	-0.0319687	528	-0.0278459	528	0.00292909
527	-0.0293271	527	0.00254096	527	-0.0320756	527	-0.0278669	527	0.00596389
526	-0.0294007	526	0.00631102	526	-0.0321224	526	-0.0279596	526	0.00913211
525	-0.029469	525	0.0103245	525	-0.0321882	525	-0.0279747	525	0.0122174
524	-0.0295422	524	0.0146227	524	-0.0322929	524	-0.0280274	524	0.0152915
523	-0.0296315	523	0.0189363	523	-0.0323262	523	-0.0280991	523	0.0181162
522	-0.0296898	522	0.0230786	522	-0.0324213	522	-0.0281818	522	0.0205187
521	-0.0297456	521	0.0270482	521	-0.0325007	521	-0.0282033	521	0.0226087
520	-0.0298059	520	0.0305324	520	-0.0325866	520	-0.0282923	520	0.0241867
519	-0.0299013	519	0.0336072	519	-0.0326559	519	-0.0283789	519	0.0252735
518	-0.0299296	518	0.0360619	518	-0.032731	518	-0.0283883	518	0.0257978
517	-0.0299931	517	0.037865	517	-0.032799	517	-0.0284887	517	0.0257693
516	-0.0300939	516	0.0389154	516	-0.0328552	516	-0.0285055	516	0.0252044
515	-0.0301166	515	0.0392786	515	-0.0329016	515	-0.0285785	515	0.0240995
514	-0.0302117	514	0.0389575	514	-0.0329718	514	-0.028641	514	0.0224796
513	-0.030233	513	0.0377816	513	-0.0330336	513	-0.0286412	513	0.0203987
512	-0.03027	512	0.0359134	512	-0.0330901	512	-0.0287428	512	0.0178967
511	-0.030367	511	0.0333972	511	-0.0331465	511	-0.0287487	511	0.0150774
510	-0.0303967	510	0.0304652	510	-0.0332085	510	-0.0288626	510	0.0122119
509	-0.0304708	509	0.0273323	509	-0.0332648	509	-0.0288813	509	0.00932844
508	-0.030509	508	0.0239039	508	-0.0333311	508	-0.0289296	508	0.00641031
507	-0.0305688	507	0.0204085	507	-0.0333609	507	-0.0289769	507	0.00367331
506	-0.0306768	506	0.0168989	506	-0.033456	506	-0.0289871	506	0.00109914
505	-0.030634	505	0.0133119	505	-0.033481	505	-0.0290318	505	-0.00134301
504	-0.0307456	504	0.00961327	504	-0.0335473	504	-0.0290955	504	-0.00369997
503	-0.0308414	503	0.00594622	503	-0.0336284	503	-0.0291591	503	-0.00588555
502	-0.0309107	502	0.00238715	502	-0.0336701	502	-0.0291605	502	-0.00791085
501	-0.0309186	501	-0.00108188	501	-0.0337401	501	-0.0292012	501	-0.00974616
500	-0.030988	500	-0.00427385	500	-0.0338064	500	-0.0292473	500	-0.0113888
499	-0.0310302	499	-0.0071994	499	-0.0338741	499	-0.0293011	499	-0.0128217
498	-0.0311255	498	-0.0097171	498	-0.0339307	498	-0.0293521	498	-0.0139655
497	-0.03115	497	-0.0118008	497	-0.0339713	497	-0.0293528	497	-0.0149267
496	-0.0312466	496	-0.0134185	496	-0.0340544	496	-0.0294479	496	-0.0156761
495	-0.0312979	495	-0.0146466	495	-0.0340811	495	-0.029488	495	-0.0161598
494	-0.0313292	494	-0.01551	494	-0.0341562	494	-0.0295576	494	-0.016537
493	-0.031397	493	-0.0160686	493	-0.0342205	493	-0.0295968	493	-0.016804
492	-0.0314823	492	-0.0164632	492	-0.0343115	492	-0.0296099	492	-0.0169351
491	-0.0315416	491	-0.0166605	491	-0.0343793	491	-0.0297073	491	-0.0169323
490	-0.0315539	490	-0.0167501	490	-0.0344333	490	-0.0297416	490	-0.0169327
489	-0.0316732	489	-0.0166656	489	-0.0345301	489	-0.0298229	489	-0.0168968
488	-0.0317373	488	-0.0165704	488	-0.0345556	488	-0.0298771	488	-0.0168396
487	-0.0318013	487	-0.0164444	487	-0.0346497	487	-0.0299201	487	-0.0168458
486	-0.0318272	486	-0.016231	486	-0.0346925	486	-0.0299276	486	-0.0168277
485	-0.0318863	485	-0.0161449	485	-0.0347839	485	-0.029969	485	-0.0168902
484	-0.0319893	484	-0.016123	484	-0.0348599	484	-0.0300576	484	-0.0170228
483	-0.0320327	483	-0.0160771	483	-0.0348933	483	-0.0300839	483	-0.0172069
482	-0.0320951	482	-0.0162005	482	-0.0349536	482	-0.0301374	482	-0.0174439
481	-0.0321695	481	-0.0163959	481	-0.0350345	481	-0.0302017	481	-0.0177092
480	-0.0322023	480	-0.0167487	480	-0.0351183	480	-0.0302451	480	-0.0180787
479	-0.0323173	479	-0.0172168	479	-0.0351828	479	-0.030362	479	-0.0184493
478	-0.0323607	478	-0.0177901	478	-0.0352594	478	-0.0303879	478	-0.0187758
477	-0.0324456	477	-0.0184119	477	-0.035352	477	-0.0304655	477	-0.0190927
476	-0.0324951	476	-0.0190946	476	-0.0354185	476	-0.030539	476	-0.0193613
475	-0.0325507	475	-0.0197739	475	-0.0354562	475	-0.0305639	475	-0.0194138
474	-0.0326104	474	-0.0204216	474	-0.0355526	474	-0.0305754	474	-0.0194041
473	-0.0327205	473	-0.0210345	473	-0.035672	473	-0.030697	473	-0.0192007
472	-0.0328112	472	-0.0216111	472	-0.0357242	472	-0.0307388	472	-0.0187572
471	-0.0329043	471	-0.0220549	471	-0.0357691	471	-0.030813	471	-0.0181045
470	-0.032892	470	-0.022484	470	-0.03586	470	-0.0308111	470	-0.0170857
469	-0.0330162	469	-0.0228074	469	-0.035947	469	-0.0309091	469	-0.015735
468	-0.0331114	468	-0.0230987	468	-0.0360099	468	-0.0309882	468	-0.0139087
467	-0.0331423	467	-0.0232997	467	-0.0360623	467	-0.0310553	467	-0.0115001
466	-0.0332442	466	-0.023476	466	-0.0361851	466	-0.0311058	466	-0.00843934
465	-0.0333156	465	-0.0236136	465	-0.0362997	465	-0.0311856	465	-0.00456279
464	-0.0333943	464	-0.0237052	464	-0.0363698	464	-0.0312048	464	0.000386416
463	-0.0334641	463	-0.0237561	463	-0.0364545	463	-0.0312769	463	0.00643743
462	-0.033544	462	-0.0237626	462	-0.0365378	462	-0.0313769	462	0.0139135
461	-0.0336066	461	-0.0237893	461	-0.0366123	461	-0.0314594	461	0.0230104
460	-0.0337169	460	-0.0237736	460	-0.0367504	460	-0.0315458	460	0.0337666
459	-0.0338013	459	-0.0237492	459	-0.0367734	459	-0.0315918	459	0.0464599
458	-0.0338577	458	-0.0237622	458	-0.036866	458	-0.0316381	458	0.0610217
457	-0.0340162	457	-0.0237824	457	-0.0369958	457	-0.0317389	457	0.0772254
456	-0.0340787	456	-0.0237756	456	-0.0370966	456	-0.031783	456	0.094837
455	-0.0341485	455	-0.0238366	455	-0.0371902	455	-0.0318932	455	0.113303
454	-0.034261	454	-0.0238168	454	-0.0372814	454	-0.0319304	454	0.131683
453	-0.0342773	453	-0.0238125	453	-0.0374178	453	-0.0320208	453	0.149091
452	-0.0344427	452	-0.0237986	452	-0.037456	452	-0.032093	452	0.164381
451	-0.0344993	451	-0.0237449	451	-0.0375916	451	-0.0321424	451	0.17633
450	-0.0345727	450	-0.023686	450	-0.0377118	450	-0.0322523	450	0.183815
449	-0.0347442	449	-0.0235563	449	-0.0377998	449	-0.0323279	449	0.186024
448	-0.0347608	448	-0.0232922	448	-0.0378937	448	-0.0323941	448	0.18272
447	-0.034845	447	-0.0229507	447	-0.0379594	447	-0.03246	447	0.174107
446	-0.0349937	446	-0.022414	446	-0.0380401	446	-0.0325277	446	0.161105
445	-0.0350267	445	-0.0217606	445	-0.0381695	445	-0.0326109	445	0.144856
444	-0.0350904	444	-0.020811	444	-0.0382758	444	-0.0326844	444	0.126921
443	-0.0351922	443	-0.0195494	443	-0.0383203	443	-0.032779	443	0.108938
442	-0.0352681	442	-0.0178208	442	-0.0383789	442	-0.0328085	442	0.092085
441	-0.0353451	441	-0.0154348	441	-0.0385437	441	-0.0329048	441	0.0778772
440	-0.0353857	440	-0.0122774	440	-0.0385811	440	-0.0329573	440	0.0667827
439	-0.0354801	439	-0.00800702	439	-0.0386822	439	-0.0330027	439	0.0594615
438	-0.0355594	438	-0.00211181	438	-0.038743	438	-0.0330854	438	0.0562727
437	-0.0355892	437	0.00579651	437	-0.0388359	437	-0.0331468	437	0.057658
436	-0.0357353	436	0.0167398	436	-0.0389405	436	-0.0331884	436	0.0641307
435	-0.0357695	435	0.0316296	435	-0.0389672	435	-0.0331986	435	0.0763953
434	-0.0358362	434	0.0520639	434	-0.0390652	434	-0.0332714	434	0.0957242
433	-0.0358618	433	0.0793092	433	-0.0391232	433	-0.0333241	433	0.123354
432	-0.0359534	432	0.116399	432	-0.0391815	432	-0.0333622	432	0.162152
431	-0.0359953	431	0.165431	431	-0.0392325	431	-0.0333665	431	0.214119
430	-0.0360294	430	0.228734	430	-0.0393185	430	-0.0334327	430	0.281703
429	-0.0360854	429	0.310031	429	-0.0393593	429	-0.0334576	429	0.368459
428	-0.036193	428	0.411644	428	-0.0394959	428	-0.0334954	428	0.476272
427	-0.0361785	427	0.534668	427	-0.0394743	427	-0.0334836	427	0.604885
426	-0.0362329	426	0.680395	426	-0.0395605	426	-0.0335306	426	0.753974
425	-0.0362524	425	0.844745	425	-0.0396323	425	-0.0335781	425	0.916447
424	-0.0363548	424	1.02382	424	-0.0397175	424	-0.0336242	424	1.08354
423	-0.0364429	423	1.20658	423	-0.0397629	423	-0.0336506	423	1.23904
422	-0.0364284	422	1.37645	422	-0.0398845	422	-0.033684	422	1.36255
421	-0.0365222	421	1.51711	421	-0.0399172	421	-0.03377	421	1.43589
420	-0.0365962	420	1.60498	420	-0.0400345	420	-0.0338638	420	1.44387
419	-0.0366704	419	1.6224	419	-0.040092	419	-0.0339087	419	1.38442
418	-0.0367241	418	1.56457	418	-0.0401848	418	-0.0339518	418	1.27054
417	-0.0368392	417	1.44258	417	-0.0402774	417	-0.0339995	417	1.1234
416	-0.0369264	416	1.28117	416	-0.0403579	416	-0.0340801	416	0.965417
415	-0.0369674	415	1.10555	415	-0.0404383	415	-0.0341257	415	0.813264
414	-0.0371055	414	0.93963	414	-0.0405555	414	-0.0342021	414	0.680524
413	-0.037196	413	0.790063	413	-0.0406315	413	-0.0342447	413	0.567275
412	-0.0371972	412	0.665549	412	-0.0406892	412	-0.0343488	412	0.476242
411	-0.0372651	411	0.565672	411	-0.0407537	411	-0.034369	411	0.405521
410	-0.0372887	410	0.487265	410	-0.0407709	410	-0.0343373	410	0.35147
409	-0.0373571	409	0.427179	409	-0.0408608	409	-0.0343992	409	0.311253
408	-0.0374392	408	0.382345	408	-0.0409358	408	-0.0343868	408	0.282374
407	-0.037484	407	0.349559	407	-0.0409689	407	-0.0344153	407	0.262035
406	-0.0374614	406	0.326507	406	-0.0409646	406	-0.0344404	406	0.248453
405	-0.0374967	405	0.310505	405	-0.0410535	405	-0.0344037	405	0.239232
404	-0.0374656	404	0.299365	404	-0.0410179	404	-0.0344523	404	0.232716
403	-0.0375155	403	0.291188	403	-0.0410855	403	-0.0343628	403	0.227167
402	-0.0375167	402	0.283591	402	-0.0410621	402	-0.0343769	402	0.220793
401	-0.0374747	401	0.27457	401	-0.0410764	401	-0.0343285	401	0.212433
400	-0.0374738	400	0.262785	400	-0.0410641	400	-0.0342958	400	0.20134
399	-0.0374247	399	0.247504	399	-0.0410512	399	-0.0342201	399	0.187601
398	-0.0373734	398	0.228955	398	-0.0410082	398	-0.0341306	398	0.171636
397	-0.0373605	397	0.2081	397	-0.0409777	397	-0.0341201	397	0.154311
396	-0.0372624	396	0.186136	396	-0.0409328	396	-0.0340575	396	0.136649
395	-0.0372376	395	0.164831	395	-0.0409415	395	-0.0340034	395	0.120011
394	-0.037143	394	0.144614	394	-0.0408134	394	-0.0338854	394	0.104651
393	-0.0370869	393	0.126366	393	-0.0407554	393	-0.0338821	393	0.0912304
392	-0.0368909	392	0.110747	392	-0.040701	392	-0.0337052	392	0.0800547
391	-0.0368496	391	0.0977431	391	-0.0406078	391	-0.0335973	391	0.0710588
390	-0.0367613	390	0.0873231	390	-0.0404868	390	-0.0335316	390	0.0641506
389	-0.0366714	389	0.0792995	389	-0.0403634	389	-0.0334047	389	0.059058
388	-0.0365062	388	0.0735002	388	-0.0402353	388	-0.0332725	388	0.055492
387	-0.0363127	387	0.0693263	387	-0.0400764	387	-0.033159	387	0.0530234
386	-0.036089	386	0.0665388	386	-0.039908	386	-0.0330527	386	0.0514692
385	-0.0358746	385	0.0647769	385	-0.0396951	385	-0.0328755	385	0.0504668
384	-0.0356138	384	0.0638569	384	-0.0394466	384	-0.0326799	384	0.0499499
383	-0.0353398	383	0.0634904	383	-0.0390621	383	-0.0325009	383	0.0497977
382	-0.0348728	382	0.0636058	382	-0.038717	382	-0.0323596	382	0.049859
381	-0.0345035	381	0.0640896	381	-0.038361	381	-0.0322146	381	0.050112
380	-0.0339216	380	0.0649705	380	-0.0377589	380	-0.0319235	380	0.05062
379	-0.0332955	379	0.0661556	379	-0.0371675	379	-0.0317509	379	0.0511892
378	-0.0325278	378	0.0676243	378	-0.0363709	378	-0.0314866	378	0.0517717
377	-0.0317039	377	0.069122	377	-0.0355651	377	-0.031267	377	0.0523649
376	-0.0307868	376	0.07069	376	-0.0346707	376	-0.0310381	376	0.0530326
375	-0.0298349	375	0.0721598	375	-0.0337273	375	-0.0307811	375	0.0535937
374	-0.0289129	374	0.0734304	374	-0.0328024	374	-0.0305226	374	0.0540426
373	-0.0279641	373	0.0745267	373	-0.0318748	373	-0.0302346	373	0.0544175
372	-0.0270238	372	0.0753093	372	-0.0309751	372	-0.029986	372	0.054724
371	-0.0261847	371	0.0759372	371	-0.0300576	371	-0.0297504	371	0.0548376
370	-0.0253487	370	0.0763376	370	-0.0293017	370	-0.029556	370	0.0548872
369	-0.0245364	369	0.0765871	369	-0.0284613	369	-0.0292703	369	0.0547867
368	-0.0237409	368	0.0767199	368	-0.0277417	368	-0.0290118	368	0.0545821
367	-0.0229542	367	0.0766124	367	-0.0269069	367	-0.0288194	367	0.0541939
366	-0.022176	366	0.0764228	366	-0.0261549	366	-0.0285777	366	0.053528
365	-0.0213207	365	0.0760545	365	-0.0252771	365	-0.0282698	365	0.0527579
364	-0.0203347	364	0.0757967	364	-0.0242806	364	-0.0280372	364	0.0517489
363	-0.019222	363	0.0755161	363	-0.0231362	363	-0.0277978	363	0.0506549
362	-0.0178694	362	0.0754154	362	-0.0218214	362	-0.0275651	362	0.0495639
361	-0.016269	361	0.0756259	361	-0.0202988	361	-0.0272724	361	0.0484943
360	-0.0144445	360	0.0760963	360	-0.0184273	360	-0.0270081	360	0.0474998
359	-0.0125822	359	0.0769215	359	-0.0164044	359	-0.0267261	359	0.046586
358	-0.010395	358	0.0780167	358	-0.0143321	358	-0.026552	358	0.0458037
357	-0.00831918	357	0.0793309	357	-0.0122594	357	-0.0262989	357	0.0450901
356	-0.00612569	356	0.080676	356	-0.0101562	356	-0.0259837	356	0.0445525
355	-0.00412526	355	0.0820354	355	-0.00804951	355	-0.0257104	355	0.0438749
354	-0.00218363	354	0.0831147	354	-0.00616463	354	-0.0255034	354	0.0433428
353	-0.000417495	353	0.0841731	353	-0.00440425	353	-0.0252344	353	0.0428035
352	0.0012069	352	0.0848334	352	-0.00269618	352	-0.0250153	352	0.0420788
351	0.00273727	351	0.08533	351	-0.00120054	351	-0.0247846	351	0.0412918
350	0.00412601	350	0.0855123	350	0.000235808	350	-0.0244702	350	0.0403756
349	0.00702091	349	0.0878545	349	0.00502956	349	-0.0211698	349	0.0417256
348	0.00867419	348	0.087987	348	0.00625411	348	-0.0213272	348	0.040795
347	0.010277	347	0.0880206	347	0.0080465	347	-0.0208761	347	0.0395667
346	0.0121895	346	0.0884344	346	0.00997126	346	-0.0208751	346	0.0383187
345	0.0144526	345	0.0891421	345	0.0122123	345	-0.0205936	345	0.0371563
344	0.0170153	344	0.0903177	344	0.0149384	344	-0.0204965	344	0.0360533
343	0.0196892	343	0.0917464	343	0.0175556	343	-0.0203284	343	0.0349996
342	0.022431	342	0.0933464	342	0.0204133	342	-0.0200739	342	0.0339439
341	0.0252461	341	0.095204	341	0.0233631	341	-0.0198053	341	0.0333345
340	0.0281336	340	0.0973545	340	0.0261643	340	-0.0194083	340	0.032583
339	0.0309656	339	0.0993188	339	0.0289469	339	-0.0194183	339	0.0320309
338	0.033534	338	0.101384	338	0.0316524	338	-0.0190022	338	0.0317122
337	0.0360928	337	0.103753	337	0.0342958	337	-0.01858	337	0.0315215
336	0.0385853	336	0.105911	336	0.0368305	336	-0.0181801	336	0.0316139
335	0.0410115	335	0.108539	335	0.039312	335	-0.017632	335	0.0317348
334	0.0435606	334	0.111165	334	0.0420147	334	-0.017178	334	0.0322689
333	0.0463307	333	0.114098	333	0.0448371	333	-0.0164834	333	0.0326697
332	0.0491573	332	0.117423	332	0.0476676	332	-0.01569	332	0.033552
331	0.0520599	331	0.121027	331	0.050824	331	-0.0147544	331	0.0345416
330	0.0552967	330	0.124967	330	0.0539638	330	-0.0136357	330	0.035811
329	0.0586821	329	0.129181	329	0.0575106	329	-0.0123013	329	0.0372492
328	0.0622286	328	0.133616	328	0.0611558	328	-0.0104085	328	0.0390795
327	0.0658133	327	0.138223	327	0.0648271	327	-0.00834138	327	0.0415055
326	0.0694278	326	0.142965	326	0.068565	326	-0.00570348	326	0.0442566
325	0.0730581	325	0.147735	325	0.0723326	325	-0.00238443	325	0.0477964
324	0.0768344	324	0.152564	324	0.0761642	324	0.00191236	324	0.0519598
323	0.0807374	323	0.157546	323	0.0801686	323	0.00707619	323	0.0573579
322	0.0846438	322	0.162724	322	0.084245	322	0.0136324	322	0.0637344
321	0.088767	321	0.168246	321	0.0884522	321	0.0215955	321	0.0717205
320	0.0930263	320	0.173892	320	0.0928909	320	0.031357	320	0.0814083
319	0.097494	319	0.179931	319	0.0974694	319	0.0431364	319	0.0930061
318	0.102417	318	0.186576	318	0.102635	318	0.0572063	318	0.10709
317	0.107896	317	0.193871	317	0.108126	317	0.0738686	317	0.123657
316	0.113281	316	0.20123	316	0.113677	316	0.0932796	316	0.142955
315	0.118643	315	0.208602	315	0.119154	315	0.115716	315	0.165163
314	0.124274	314	0.216457	314	0.124931	314	0.141395	314	0.190777
313	0.130345	313	0.22514	313	0.131505	313	0.170214	313	0.219283
312	0.137309	312	0.234481	312	0.138497	312	0.202387	312	0.251081
311	0.144717	311	0.244178	311	0.146293	311	0.237367	311	0.285481
310	0.152875	310	0.254816	310	0.154443	310	0.275569	310	0.323206
309	0.161792	309	0.266416	309	0.16365	309	0.316378	309	0.363199
308	0.172082	308	0.279408	308	0.174224	308	0.359313	308	0.405238
307	0.184305	307	0.294387	307	0.186726	307	0.404849	307	0.449824
306	0.198761	306	0.311728	306	0.201495	306	0.452781	306	0.496851
305	0.216111	305	0.331956	305	0.219341	305	0.502869	305	0.545835
304	0.237961	304	0.356535	304	0.241321	304	0.555465	304	0.596915
303	0.265836	303	0.387627	303	0.269665	303	0.610066	303	0.650313
302	0.302881	302	0.427673	302	0.307038	302	0.667142	302	0.705913
301	0.351977	301	0.480045	301	0.356613	301	0.72646	301	0.763706
300	0.415541	300	0.547126	300	0.420692	300	0.785892	300	0.821345
299	0.499798	299	0.63507	299	0.505513	299	0.846245	299	0.880079
298	0.60882	298	0.747629	298	0.614745	298	0.906304	298	0.938595
297	0.74988	297	0.892155	297	0.756319	297	0.965444	297	0.995832
296	0.933214	296	1.07928	296	0.939979	296	1.02287	296	1.05177
295	1.16966	295	1.31844	295	1.17644	295	1.07929	295	1.10673
294	1.46974	294	1.62192	294	1.47625	294	1.13468	294	1.15997
293	1.84363	293	1.99786	293	1.84896	293	1.18856	293	1.21271
292	2.2926	292	2.44962	292	2.29806	292	1.24145	292	1.26423
291	2.82711	291	2.98506	291	2.83159	291	1.29324	291	1.31489
290	3.43156	290	3.58934	290	3.43533	290	1.34337	290	1.36351
289	4.09699	289	4.27229	289	4.10142	289	1.39151	289	1.41064
288	4.79292	288	5.06873	288	4.84604	288	1.43675	288	1.45512
287	5.5274	287	5.37734	287	5.3731	287	1.47961	287	1.49765
286	10	286	5.97156	286	10	286	1.51902	286	1.53671
285	10	285	7.21709	285	6.74153	285	1.55542	285	1.57152
284	5.81615	284	5.83611	284	10	284	1.58861	284	1.60394
283	6.03656	283	10	283	10	283	1.61753	283	1.63262
282	5.99653	282	5.74635	282	5.65738	282	1.64317	282	1.65744
281	10	281	10	281	10	281	1.66563	281	1.67928
280	10	280	10	280	10	280	1.6838	280	1.69741
279	10	279	10	279	10	279	1.69869	279	1.71144
278	6.14857	278	5.95648	278	6.3402	278	1.70978	278	1.72238
277	10	277	6.97565	277	10	277	1.71761	277	1.73012
276	10	276	10	276	10	276	1.7211	276	1.73422
275	10	275	10	275	5.6925	275	1.72038	275	1.73376
274	10	274	10	274	10	274	1.71641	274	1.72976
273	10	273	10	273	10	273	1.7074	273	1.72125
272	10	272	10	272	10	272	1.69475	272	1.70862
271	10	271	7.07138	271	6.36103	271	1.67785	271	1.69213
270	10	270	10	270	10	270	1.65823	270	1.6733
269	10	269	10	269	6.27088	269	1.63465	269	1.65071
268	6.88764	268	5.71774	268	10	268	1.60884	268	1.62549
267	6.45912	267	10	267	10	267	1.57988	267	1.59753
266	10	266	10	266	10	266	1.54733	266	1.56649
265	5.74444	265	5.71541	265	6.1938	265	1.51222	265	1.53301
264	10	264	10	264	10	264	1.47503	264	1.49734
263	10	263	10	263	10	263	1.43533	263	1.4599
262	10	262	7.14884	262	5.55711	262	1.3951	262	1.42191
261	10	261	10	261	10	261	1.3539	261	1.38316
260	10	260	10	260	10	260	1.31213	260	1.34437
259	10	259	10	259	10	259	1.27051	259	1.306
258	10	258	6.49091	258	6.04961	258	1.22926	258	1.2686
257	10	257	10	257	10	257	1.18957	257	1.23322
256	10	256	10	256	10	256	1.15181	256	1.20005
255	10	255	10	255	10	255	1.11695	255	1.17082
254	10	254	10	254	6.79906	254	1.08699	254	1.14633
253	10	253	10	253	10	253	1.06192	253	1.12756
252	6.33919	252	6.34278	252	6.56957	252	1.04338	252	1.11598
251	10	251	10	251	10	251	1.03331	251	1.11323
250	10	250	10	250	10	250	1.03301	250	1.12157
249	10	249	10	249	6.85518	249	1.04534	249	1.14309
248	10	248	10	248	10	248	1.07267	248	1.18092
247	10	247	10	247	10	247	1.118	247	1.23783
246	10	246	10	246	10	246	1.18497	246	1.31765
245	10	245	10	245	10	245	1.27838	245	1.42595
244	10	244	10	244	10	244	1.40367	244	1.56846
243	6.55606	243	5.98598	243	6.35601	243	1.56341	243	1.74696
242	10	242	10	242	10	242	1.76964	242	1.97454
241	10	241	10	241	10	241	2.02818	241	2.258
240	10	240	10	240	5.98692	240	2.3476	240	2.6047
239	10	239	10	239	10	239	2.73791	239	3.02458
238	10	238	10	238	10	238	3.21413	238	3.53387
237	10	237	10	237	10	237	3.79053	237	4.152
236	10	236	10	236	10	236	4.52121	236	4.94436
235	6.21037	235	10	235	5.95735	235	5.46178	235	10
234	10	234	10	234	10	234	6.54209	234	10
233	10	233	10	233	10	233	10	233	10
232	10	232	10	232	10	232	10	232	10
231	10	231	10	231	10	231	10	231	10
230	10	230	10	230	10	230	10	230	10
229	10	229	10	229	10	229	10	229	10
228	10	228	10	228	10	228	10	228	10
227	10	227	10	227	10	227	10	227	10
226	10	226	10	226	10	226	10	226	10
225	10	225	10	225	10	225	10	225	10
224	10	224	10	224	10	224	10	224	10
223	10	223	10	223	10	223	10	223	10
222	10	222	10	222	10	222	10	222	10
221	10	221	10	221	10	221	10	221	10
220	10	220	10	220	10	220	10	220	10
219	10	219	10	219	10	219	10	219	10
218	10	218	10	218	10	218	10	218	10
217	10	217	10	217	10	217	10	217	10
216	10	216	10	216	10	216	10	216	10
215	10	215	10	215	10	215	10	215	10
214	10	214	10	214	10	214	10	214	10
213	10	213	10	213	10	213	10	213	10
212	10	212	10	212	10	212	10	212	10
211	10	211	10	211	10	211	10	211	10
210	10	210	10	210	10	210	10	210	10
209	10	209	10	209	10	209	10	209	10
208	10	208	10	208	10	208	10	208	10
207	10	207	10	207	10	207	10	207	10
206	10	206	10	206	10	206	10	206	10
205	10	205	10	205	10	205	10	205	10
204	10	204	10	204	10	204	10	204	10
203	10	203	10	203	10	203	10	203	10
202	10	202	10	202	10	202	10	202	10
201	10	201	10	201	10	201	10	201	10
200	10	200	10	200	10	200	10	200	10
blank
blank
Collection Time: 13.09.19 15:39:04
Operator Name :
Scan Version 6.1.0.1568
Parameter List :
Instrument Cary 5000
Instrument Version 2.24
Method Log :
Method Name :
Date/Time stamp: 13.09.19 15:37:50
Method Modifications:
NIR interval Changed: 13.09.19 15:38:08	Old: -0.020	New: -1.000
End Method Modifications
<Current Wavelength>	200
<SBW (nm)>	2
<Energy>	20.89
<Slit Height>	Full
sample PrTPP
sample PrTPP
Collection Time: 13.09.19 15:40:53
Operator Name :
Scan Version 6.1.0.1568
Parameter List :
Instrument Cary 5000
Instrument Version 2.24
Method Log :
Method Name :
Date/Time stamp: 13.09.19 15:37:50
Method Modifications:
NIR interval Changed: 13.09.19 15:38:08	Old: -0.020	New: -1.000
End Method Modifications
<Current Wavelength>	200
<SBW (nm)>	2
<Energy>	21.88
<Slit Height>	Full
blank1_m2
blank1_m2
Collection Time: 13.09.19 15:42:59
Operator Name :
Scan Version 6.1.0.1568
Parameter List :
Instrument Cary 5000
Instrument Version 2.24
Method Log :
Method Name :
Date/Time stamp: 13.09.19 15:37:50
Method Modifications:
NIR interval Changed: 13.09.19 15:38:08	Old: -0.020	New: -1.000
End Method Modifications
<Current Wavelength>	200
<SBW (nm)>	2
<Energy>	21.88
<Slit Height>	Full
blank_CF
blank_CF
Collection Time: 13.09.19 16:02:08
Operator Name :
Scan Version 6.1.0.1568
Parameter List :
Instrument Cary 5000
Instrument Version 2.24
Method Log :
Method Name :
Date/Time stamp: 13.09.19 15:37:50
Method Modifications:
NIR interval Changed: 13.09.19 15:38:08	Old: -0.020	New: -1.000
End Method Modifications
<Current Wavelength>	200
<SBW (nm)>	2
<Energy>	21.88
<Slit Height>	Full
PrTPP in CF
PrTPP in CF
Collection Time: 13.09.19 16:03:43
Operator Name :
Scan Version 6.1.0.1568
Parameter List :
Instrument Cary 5000
Instrument Version 2.24
Method Log :
Method Name :
Date/Time stamp: 13.09.19 15:37:50
Method Modifications:
NIR interval Changed: 13.09.19 15:38:08	Old: -0.020	New: -1.000
End Method Modifications
<Current Wavelength>	200
<SBW (nm)>	2
<Energy>	21.88
<Slit Height>	Full

## Sheet: EVAL
ABSORBANCE	in 1-methyl-1-cyclohexene	in chloroform
maximum:	482839	429180
800	390.856	31.9853
799	402.751	27.3079
798	424.303	52.5425
797	412.121	26.5579
796	387.14	41.2311
795	375.713	8.74871
794	400.59	75.5472
793	410.87	66.1516
792	417.381	23.4042
791	402.6	59.209
790	422.816	28.8327
789	435.529	34.515
788	407.345	18.1104
787	425.784	5.0043
786	408.651	46.6559
785	427.515	8.97176
784	433.061	10.8328
783	448.524	7.7869
782	427.893	20.8909
781	425.291	1.3416
780	443.192	10.4288
779	441.287	20.4358
778	419.042	14.5788
777	436.788	2.60463
776	432.716	10.3839
775	449.73	6.81093
774	416.859	2.52713
773	421.151	4.6361
772	448.144	0.430746
771	439.669	34.2528
770	446.063	0.964817
769	451.017	2.41799
768	422.433	2.19471
767	464.283	6.68502
766	467.164	10.9792
765	450.658	17.5924
764	442.225	11.384
763	448.295	10.5822
762	453.359	21.7452
761	466.981	9.0335
760	464.301	26.2458
759	455.989	23.7424
758	461.314	4.16411
757	451.273	33.9947
756	470.496	27.0733
755	454.734	25.6165
754	470.583	6.19193
753	471.641	42.9821
752	455.74	33.8592
751	455.92	44.1855
750	469.373	7.88786
749	476.722	36.5167
748	472.2	15.4557
747	477.528	19.0529
746	477.944	66.089
745	462.576	41.2223
744	461.678	53.5521
743	460.637	47.8319
742	462.069	70.6194
741	451.06	61.715
740	479.394	78.032
739	478.79	89.9936
738	463.493	82.7717
737	492.599	88.4513
736	487.522	100.63
735	478.765	114.239
734	486.049	100.185
733	490.98	127.872
732	493.751	134.549
731	491.98	145.912
730	489.396	157.768
729	494.393	178.031
728	489.47	181.919
727	492.654	207.301
726	481.783	210.016
725	496.841	240.869
724	506.147	244.889
723	497.056	275.368
722	509.299	319.827
721	495.696	353.329
720	516.439	375.69
719	499.2	413.16
718	502.126	463.306
717	502.957	518.839
716	524.526	553.152
715	504.873	608.415
714	517.298	682.072
713	519.848	727.401
712	500.284	820.122
711	503.843	882.074
710	517.301	966.005
709	511.112	1081.18
708	521.777	1194.68
707	525.846	1290.77
706	523.123	1409.19
705	540.098	1551.29
704	519.499	1695.44
703	535.562	1862.56
702	528.92	2016.4
701	529.897	2190.06
700	552.147	2384.18
699	553.966	2589.78
698	544.478	2795.33
697	556.276	3034.79
696	551.978	3262.31
695	546.05	3513.58
694	554.754	3777.25
693	559.394	4040.3
692	561.979	4312.36
691	582.386	4601.19
690	576.252	4893.42
689	595.226	5198.96
688	564.675	5506.84
687	598.596	5818.23
686	592.799	6119.16
685	608.253	6415.89
684	595.877	6735.51
683	611.758	7009.5
682	643.513	7296.29
681	636.89	7540.72
680	648.489	7808.87
679	677.144	8043.97
678	682.076	8258.51
677	708.641	8440.4
676	713.196	8589.78
675	746.175	8715.92
674	758.843	8832.53
673	801.172	8879.62
672	854.533	8935.41
671	897.735	8938.91
670	965.587	8944.42
669	1021.94	8909.96
668	1107.48	8855.08
667	1188.36	8789.11
666	1298.73	8688.49
665	1434.69	8612.42
664	1596.32	8503.51
663	1778.41	8417.19
662	2015.06	8332.45
661	2284.88	8266.65
660	2621.66	8225.16
659	3023.17	8226.71
658	3484.85	8243.08
657	4034.2	8299.47
656	4625.17	8348.39
655	5225.27	8432.86
654	5775.43	8505.53
653	6187.67	8543.39
652	6401.43	8547.14
651	6389.26	8508.54
650	6200.54	8401.38
649	5890.9	8219.85
648	5517.83	7978.11
647	5091.16	7642.87
646	4629.84	7269.15
645	4173.45	6824.59
644	3716.64	6349.74
643	3283.51	5843.96
642	2933.36	5351.2
641	2630.32	4867.39
640	2376.16	4423.75
639	2188.48	4025.25
638	2012.74	3662.49
637	1853.74	3355.26
636	1704.49	3069.51
635	1593.9	2829.4
634	1498.72	2640.19
633	1393.56	2478.96
632	1340.32	2334.22
631	1275.63	2203.31
630	1222.37	2104.47
629	1181.29	2027.41
628	1168.44	1951.83
627	1162.96	1909.32
626	1154.54	1865
625	1178.77	1853.9
624	1203.35	1845.37
623	1242.75	1843.75
622	1280.41	1864.04
621	1344.91	1900.9
620	1410.57	1911.65
619	1493.89	1972.66
618	1586.78	2008.22
617	1694.75	2081.91
616	1821.85	2132.12
615	1939.7	2203.45
614	2065.61	2284.73
613	2197.9	2364.87
612	2349.8	2458.01
611	2514.06	2551.45
610	2667.56	2650.7
609	2849.36	2750.43
608	3034.56	2870.79
607	3242.2	3009.28
606	3486.75	3133.24
605	3754.31	3293.34
604	4058.35	3456.65
603	4392.28	3635.07
602	4742.31	3843.64
601	5079.84	4051.99
600	5390.7	4229.43
599	5671.03	4425.83
598	5890.81	4601.28
597	6076.02	4763.04
596	6209.88	4901.14
595	6319.91	4984.93
594	6378.66	5060.36
593	6389.58	5091.63
592	6341.69	5076.06
591	6232.93	5022.58
590	6054.96	4922.33
589	5789.8	4767.35
588	5438.95	4579.19
587	5038.67	4344.52
586	4604.36	4094.43
585	4217.32	3814.19
584	3873.01	3547.49
583	3551.92	3254.8
582	3314.2	3027.71
581	3097.94	2795.94
580	2910.36	2617.12
579	2784.03	2464.03
578	2624.54	2322.53
577	2512.53	2253.42
576	2416.25	2180.89
575	2345.54	2151.94
574	2298.53	2161.88
573	2290.73	2206.85
572	2316.09	2282.8
571	2359.88	2404.16
570	2478.98	2578.92
569	2604.91	2779.55
568	2785.53	3044.77
567	2985.92	3363.59
566	3244.31	3716.9
565	3537.91	4135.32
564	3886.26	4592.78
563	4306.47	5069.84
562	4812.94	5604.95
561	5332.13	6150.64
560	5953.28	6692.29
559	6615	7231.14
558	7339.63	7713.1
557	8068.77	8169.96
556	8814.05	8511.99
555	9527.47	8774.72
554	10193.2	8899.71
553	10773.9	8923.45
552	11227.2	8825.22
551	11560.4	8619.58
550	11744.1	8341.5
549	11754	7979.46
548	11610.3	7559.26
547	11282.6	7127.19
546	10810.1	6655.92
545	10202.5	6207.06
544	9507.57	5773.19
543	8736	5358.05
542	7963.49	4979.9
541	7228.96	4685.99
540	6540.22	4452.17
539	5974.9	4294.93
538	5542.32	4238.9
537	5268.72	4269.77
536	5165.15	4418.17
535	5226.69	4637.88
534	5398.41	4981.42
533	5710.57	5416.39
532	6130.83	5977.17
531	6685.03	6582.21
530	7350.52	7304.52
529	8143.71	8071.31
528	9027.48	8938
527	10053.7	9825.5
526	11162.2	10772.5
525	12347	11673
524	13625.7	12581.1
523	14888.2	13422.3
522	16118.8	14144.1
521	17294.8	14757.4
520	18331.7	15241.5
519	19244.8	15582.3
518	19979.5	15737.3
517	20523	15758.2
516	20844.4	15599
515	20963.3	15299.3
514	20890.5	14847
513	20566.9	14242.7
512	20040.7	13545.5
511	19326.3	12728.4
510	18492.8	11929.3
509	17599.2	11097.3
508	16622.8	10263.8
507	15616.3	9482.62
506	14624.6	8737.95
505	13590.1	8041.68
504	12535.1	7375.64
503	11493.7	6759.36
502	10472.1	6171.55
501	9484.93	5650.32
500	8577.15	5186.67
499	7747.15	4786.11
498	7032.35	4468.74
497	6438.99	4189.78
496	5993.28	3999.74
495	5644.35	3870.92
494	5415.42	3781.56
493	5271.84	3715.42
492	5183.69	3681.14
491	5146.08	3710.27
490	5135.74	3720.11
489	5188.38	3754.15
488	5223.45	3786.47
487	5287.37	3797.16
486	5361.77	3804.63
485	5413.31	3798.47
484	5441.78	3785.71
483	5464.8	3739.86
482	5446.45	3686.58
481	5413.21	3628.2
480	5335.08	3533.51
479	5217.86	3459.81
478	5073.6	3372.52
477	4919.92	3302.98
476	4740.96	3246.33
475	4554.6	3238.32
474	4394.49	3244.47
473	4251.18	3338.85
472	4098.85	3479.8
471	3983	3690.93
470	3884.82	3986.26
469	3816.15	4407
468	3749.82	4960.41
467	3706.64	5679.42
466	3691.12	6583.02
465	3684.44	7732.08
464	3678.18	9175.04
463	3688.02	10953.4
462	3710.3	13153.7
461	3724.2	15819.7
460	3768.86	18968.7
459	3782.61	22668.6
458	3805.76	26911.2
457	3837.55	31646.5
456	3868.8	36774.3
455	3878.29	42169.5
454	3910.54	47518.3
453	3951.37	52600.4
452	3966.52	57062
451	4021.52	60546.6
450	4073.53	62752.6
449	4136.74	63415.9
448	4240.72	62475.7
447	4358.98	59993.2
446	4538.31	56236.9
445	4765.65	51541.7
444	5072.31	46354.1
443	5451.63	41159
442	5970.69	36272.9
441	6711.53	32174.4
440	7639.39	28967.5
439	8909.01	26854.4
438	10638.8	25952.3
437	12962.6	26372.5
436	16171.3	28264.4
435	20503.4	31829.4
434	26466.7	37464.2
433	34396.3	45504
432	45185.3	56783.3
431	59440.6	71877.4
430	77850.5	91525.1
429	101473	116729
428	131025	148052
427	166748	185401
426	209097	228715
425	256850	275916
424	308883	324457
423	361975	369628
422	411347	405508
421	452209	426835
420	477761	429180
419	482839	411927
418	466069	378865
417	430666	336145
416	383813	290284
415	332831	246108
414	284676	207578
413	241259	174699
412	205113	148291
411	176124	127757
410	153358	112050
409	135933	100388
408	122934	91996.8
407	113421	86098.3
406	106725	82160.8
405	102103	79472.1
404	98857.5	77593.7
403	96502.3	75956.2
402	94289.2	74109.2
401	91673.3	71666.9
400	88247.1	68435.7
399	83805.2	64423.7
398	78405.4	59760.8
397	72339.8	54726
396	65947.7	49578.2
395	59762.5	44730.4
394	53853.6	40235.2
393	48537.2	36336.5
392	43985.1	33039.3
391	40181.3	30395.3
390	37119.9	28369.8
389	34753.7	26854
388	33032.2	25779.9
387	31773.8	25030
386	30915.4	24547.7
385	30341.8	24205.1
384	30002.5	23998.2
383	29784.4	23902
382	29717.6	23878.8
381	29754.7	23910.1
380	29835.7	23973.2
379	30008.2	24088.3
378	30203.4	24180.7
377	30404.3	24289.2
376	30600	24416.7
375	30752.8	24505
374	30853.2	24560.3
373	30902.2	24585.6
372	30868.2	24602.4
371	30784.1	24566.9
370	30680.9	24524.9
369	30509.3	24412.7
368	30338.8	24278.2
367	30065.1	24109.6
366	29791.6	23846
365	29429.8	23532.9
364	29065.5	23172.3
363	28651.6	22785
362	28240.5	22400.6
361	27859.5	22004.9
360	27452.5	21639.4
359	27104.7	21292
358	26820.9	21014.3
357	26600.6	20733.5
356	26380.4	20485.8
355	26163.4	20209.7
354	25929.4	19995
353	25725.5	19760.3
352	25421.2	19486.2
351	25131.1	19190.6
350	24766.9	18833.2
349	24054.9	18266.7
348	23737.7	18042.2
347	23226.9	17554.4
346	22788.1	17191.7
345	22342.8	16772.3
344	21892.4	16423.8
343	21547.2	16068.9
342	21182	15688.4
341	20864.8	15433.4
340	20675.8	15099.8
339	20438.1	14942.4
338	20252.1	14729
337	20172.6	14551
336	20063.2	14461.7
335	20105.6	14337.6
334	20083.4	14360.9
333	20115.3	14275.6
332	20259	14301.4
331	20389	14317.1
330	20621.3	14360.8
329	20815.2	14391
328	21044.5	14372.8
327	21316.5	14477.1
326	21607.9	14509.9
325	21899.3	14574
324	22188.8	14535.3
323	22472.6	14603.3
322	22792.6	14551.2
321	23174.6	14557.8
320	23525.2	14536.4
319	23949.5	14483.7
318	24379.2	14487.7
317	24903.1	14460.1
316	25428.1	14427.3
315	25978.6	14360.8
314	26582.2	14341.9
313	27194.5	14251.3
312	27876.7	14142.3
311	28428.8	13973.8
310	29151.2	13835.2
309	29846.3	13598.1
308	30548.6	13338.1
307	31268.1	13062.1
306	32015.1	12799.1
305	32706.9	12478.4
304	33461.8	12038.3
303	34260	11689
302	35035.9	11260.4
301	35848.4	10817.5
300	36720.4	10296.8
299	37627.3	9826.43
298	38593.6	9378.33
297	39450.8	8825.59
296	40457	8391.95
295	41242.4	7970.12
294	42308.1	7346.96
293	43245	7016.21
292	44018.7	6616.23
291	44573.7	6288.6
290	44730.3	5850.91
289	49627	5555.48
288	64673.7	5337.19
287	1231.99	5237.86
286	1.16998e+06	5135.83
285	138118	4676.98
284	1.20932e+06	4450.62
283	0	4380.75
282	25842.1	4143.94
281	0	3963.77
280	0	3953.48
279	0	3703.79
278	111444	3656.95
277	878363	3632.26
276	0	3809.98
275	1.25103e+06	3884.97
274	0	3877.18
273	0	4019.96
272	0	4028.03
271	206307	4148.41
270	0	4377.74
269	1.08305e+06	4665.21
268	1.2437e+06	4835.06
267	0	5123.64
266	0	5564.76
265	138938	6038.42
264	0	6480.44
263	0	7137.77
262	462288	7784.37
261	0	8497
260	0	9362.58
259	0	10307.7
258	128167	11425.1
257	0	12677.7
256	0	14010.5
255	0	15646.9
254	929651	17236.2
253	0	19066.2
252	65868.2	21085.8
251	0	23212
250	0	25720.7
249	913351	28390.7
248	0	31437.6
247	0	34802.8
246	0	38532.5
245	0	42859.5
244	0	47857.8
243	107466	53309.8
242	0	59508.7
241	0	66746.5
240	1.16552e+06	74671.2
239	0	83257.8
238	0	92862.1
237	0	104980
236	0	122895
235	1.17411e+06	1.31804e+06
234	0	1.00428e+06
233	0	0
232	0	0
231	0	0
230	0	0
229	0	0
228	0	0
227	0	0
226	0	0
225	0	0
224	0	0
223	0	0
222	0	0
221	0	0
220	0	0
219	0	0
218	0	0
217	0	0
216	0	0
215	0	0
214	0	0
213	0	0
212	0	0
211	0	0
210	0	0
209	0	0
208	0	0
207	0	0
206	0	0
205	0	0
204	0	0
203	0	0
202	0	0
201	0	0
200	0	0
0	0
0	0
0	0
0	0
0	0
0	0
0	0
0	0
0	0
0	0
0	0
0	0
0	0
0	0
0	0
0	0
0	0
0	0
0	0
0	0
0	0
0	0
0	0
0	0
0	0
0	0
0	0
0	0
0	0
0	0
0	0
0	0
0	0
0	0
0	0
0	0
0	0
0	0
0	0
0	0
0	0
0	0
0	0
0	0
0	0
0	0
0	0
0	0
0	0
0	0
0	0
0	0
0	0
0	0
0	0
0	0
0	0
0	0
0	0
0	0
0	0
0	0
0	0
0	0
0	0
0	0
0	0
0	0
0	0
0	0
0	0
0	0
0	0
0	0
0	0
0	0
0	0
0	0
0	0
0	0
0	0
0	0
0	0
0	0
0	0
0	0
0	0
0	0
0	0
0	0
0	0
0	0
0	0
0	0
0	0
0	0
0	0
0	0
0	0
0	0
0	0
0	0
0	0
0	0
0	0
0	0
0	0
0	0
0	0
0	0
0	0
0	0
0	0
0	0
0	0
0	0
0	0
0	0
0	0
0	0
0	0
0	0
0	0
0	0
0	0
0	0
0	0
0	0
0	0
0	0
0	0
0	0
0	0
0	0
0	0
0	0
0	0
0	0
0	0
0	0
0	0
0	0
0	0
0	0
0	0
0	0
0	0
0	0
0	0
0	0
0	0
0	0
0	0
0	0
0	0
0	0
0	0
0	0
0	0
0	0
0	0
0	0
0	0
0	0
0	0
0	0
0	0
0	0
0	0
0	0
0	0
0	0
0	0
0	0
0	0
0	0
0	0
0	0
0	0
0	0
0	0
0	0
0	0
0	0
0	0
0	0
0	0
0	0
0	0
0	0
0	0
0	0
0	0
0	0
0	0
0	0
0	0
0	0
0	0
0	0
0	0
0	0
0	0
0	0
0	0
0	0
0	0
0	0
0	0
0	0
0	0
0	0
0	0
0	0
0	0
0	0
0	0
0	0
0	0
0	0
0	0
0	0
0	0
0	0
0	0
0	0
0	0
0	0
0	0
0	0
0	0
0	0
0	0
0	0
0	0
0	0
0	0
0	0
0	0
0	0
0	0
0	0
0	0
0	0
0	0
0	0
0	0
0	0
0	0
0	0
0	0
0	0
0	0
0	0
0	0
0	0
0	0
0	0
0	0
0	0
0	0
0	0
0	0
0	0
0	0
0	0
0	0
0	0
0	0
0	0
0	0
0	0
0	0
0	0
0	0
0	0
0	0
0	0
0	0
0	0
0	0
0	0
0	0
0	0
0	0
0	0
0	0
0	0
0	0
0	0
0	0
0	0
0	0
0	0
0	0
0	0
0	0
0	0
0	0
0	0
0	0
0	0
0	0
0	0
0	0
0	0
0	0
0	0
0	0
0	0
0	0
0	0
0	0
0	0
0	0
0	0
0	0
0	0
0	0
0	0
0	0
0	0
0	0
0	0
0	0
0	0
0	0
0	0
0	0
0	0
0	0
0	0
0	0
0	0
0	0
0	0
0	0
0	0
0	0
0	0
0	0
0	0
0	0
0	0
0	0
0	0
0	0
0	0
0	0
0	0
0	0
0	0
0	0
0	0
0	0
0	0
0	0
0	0
0	0
0	0
0	0
0	0
0	0
0	0
0	0
0	0
0	0
0	0
0	0
0	0
0	0
0	0
0	0
0	0
0	0
0	0
0	0
0	0
0	0
0	0
0	0
0	0
0	0
0	0
0	0
0	0
0	0
0	0
0	0
0	0
0	0
0	0
0	0
0	0
0	0
0	0
0	0
0	0
0	0
0	0
0	0
0	0
0	0
0	0
0	0
0	0
0	0
0	0
0	0
0	0
0	0
0	0
0	0
0	0
0	0
0	0
0	0
0	0
0	0
0	0
0	0
0	0
0	0
0	0
0	0
0	0
0	0
0	0
0	0
0	0
0	0
0	0
0	0
0	0
0	0
0	0
0	0
0	0
0	0
0	0
0	0
0	0
0	0
0	0
0	0
0	0
0	0
0	0
0	0
0	0
0	0
0	0
0	0
0	0
0	0
0	0
0	0
0	0
0	0
0	0
0	0
0	0
0	0
0	0
0	0
0	0
0	0
0	0
0	0
0	0
0	0
0	0
0	0
0	0
0	0
0	0
0	0
0	0
0	0
0	0
0	0
0	0
0	0
0	0
0	0
0	0
0	0
0	0
0	0
0	0
0	0
0	0
0	0
0	0
0	0
0	0
0	0
0	0
0	0
0	0
0	0
0	0
0	0
0	0
0	0
0	0
0	0
0	0
0	0
0	0
0	0
0	0
0	0
0	0
0	0
0	0
0	0
0	0
0	0
0	0
0	0
0	0
0	0
0	0
0	0
0	0
0	0
0	0
0	0
0	0
0	0
0	0
0	0
0	0
0	0
0	0
0	0
0	0
0	0
0	0
0	0
0	0
0	0
0	0
0	0
0	0
0	0
0	0
0	0
0	0
0	0
0	0
0	0
0	0
0	0
0	0
0	0
0	0
0	0
0	0
0	0
0	0
0	0
0	0
0	0
0	0
0	0
0	0
0	0
0	0
0	0
0	0
0	0
0	0
0	0
0	0
0	0
0	0
0	0
0	0
0	0
0	0
0	0
0	0
0	0
0	0
0	0
0	0
0	0
0	0
0	0
0	0
0	0
0	0
0	0
0	0
0	0
0	0
0	0
0	0
0	0
0	0
0	0
0	0
0	0
0	0
0	0
0	0
0	0
0	0
0	0
0	0
0	0
0	0
0	0
0	0
0	0
0	0
0	0
0	0
0	0
0	0
0	0
0	0
0	0
0	0
0	0
0	0
0	0
0	0
0	0
0	0
0	0
0	0
0	0
0	0
0	0
0	0
0	0
0	0
0	0
0	0
0	0
0	0
0	0
0	0
0	0
0	0
0	0
0	0
0	0
0	0
0	0
0	0
0	0
0	0
0	0
0	0
0	0
0	0
0	0
0	0
0	0
0	0
0	0
0	0
0	0
0	0
0	0
0	0
0	0
0	0
0	0
0	0
0	0
0	0
0	0
0	0
0	0
0	0
0	0
0	0
0	0
0	0
0	0
0	0
0	0
0	0
0	0
0	0
0	0
0	0
0	0
0	0
0	0
0	0
0	0
0	0
0	0
0	0
0	0
0	0
0	0
0	0
0	0
0	0
0	0
0	0
0	0
0	0
0	0
0	0
0	0
0	0
0	0
0	0
0	0
0	0
0	0
0	0
0	0
0	0
0	0
0	0
0	0
0	0
0	0
0	0
0	0
0	0
0	0
0	0
0	0
0	0
0	0
0	0
0	0
0	0
0	0
0	0
0	0
0	0
0	0
0	0
0	0
0	0
0	0
0	0
0	0
0	0
0	0
0	0
0	0
0	0
0	0
0	0
0	0
0	0
0	0
0	0
