# Supplementary material for: An entirely solvent-free photooxygenation of olefins under continuous flow conditions
Source: Royal Society of Chemistry journal article supplement (doi:10.1039/d0gc00436g), 2020-01-01

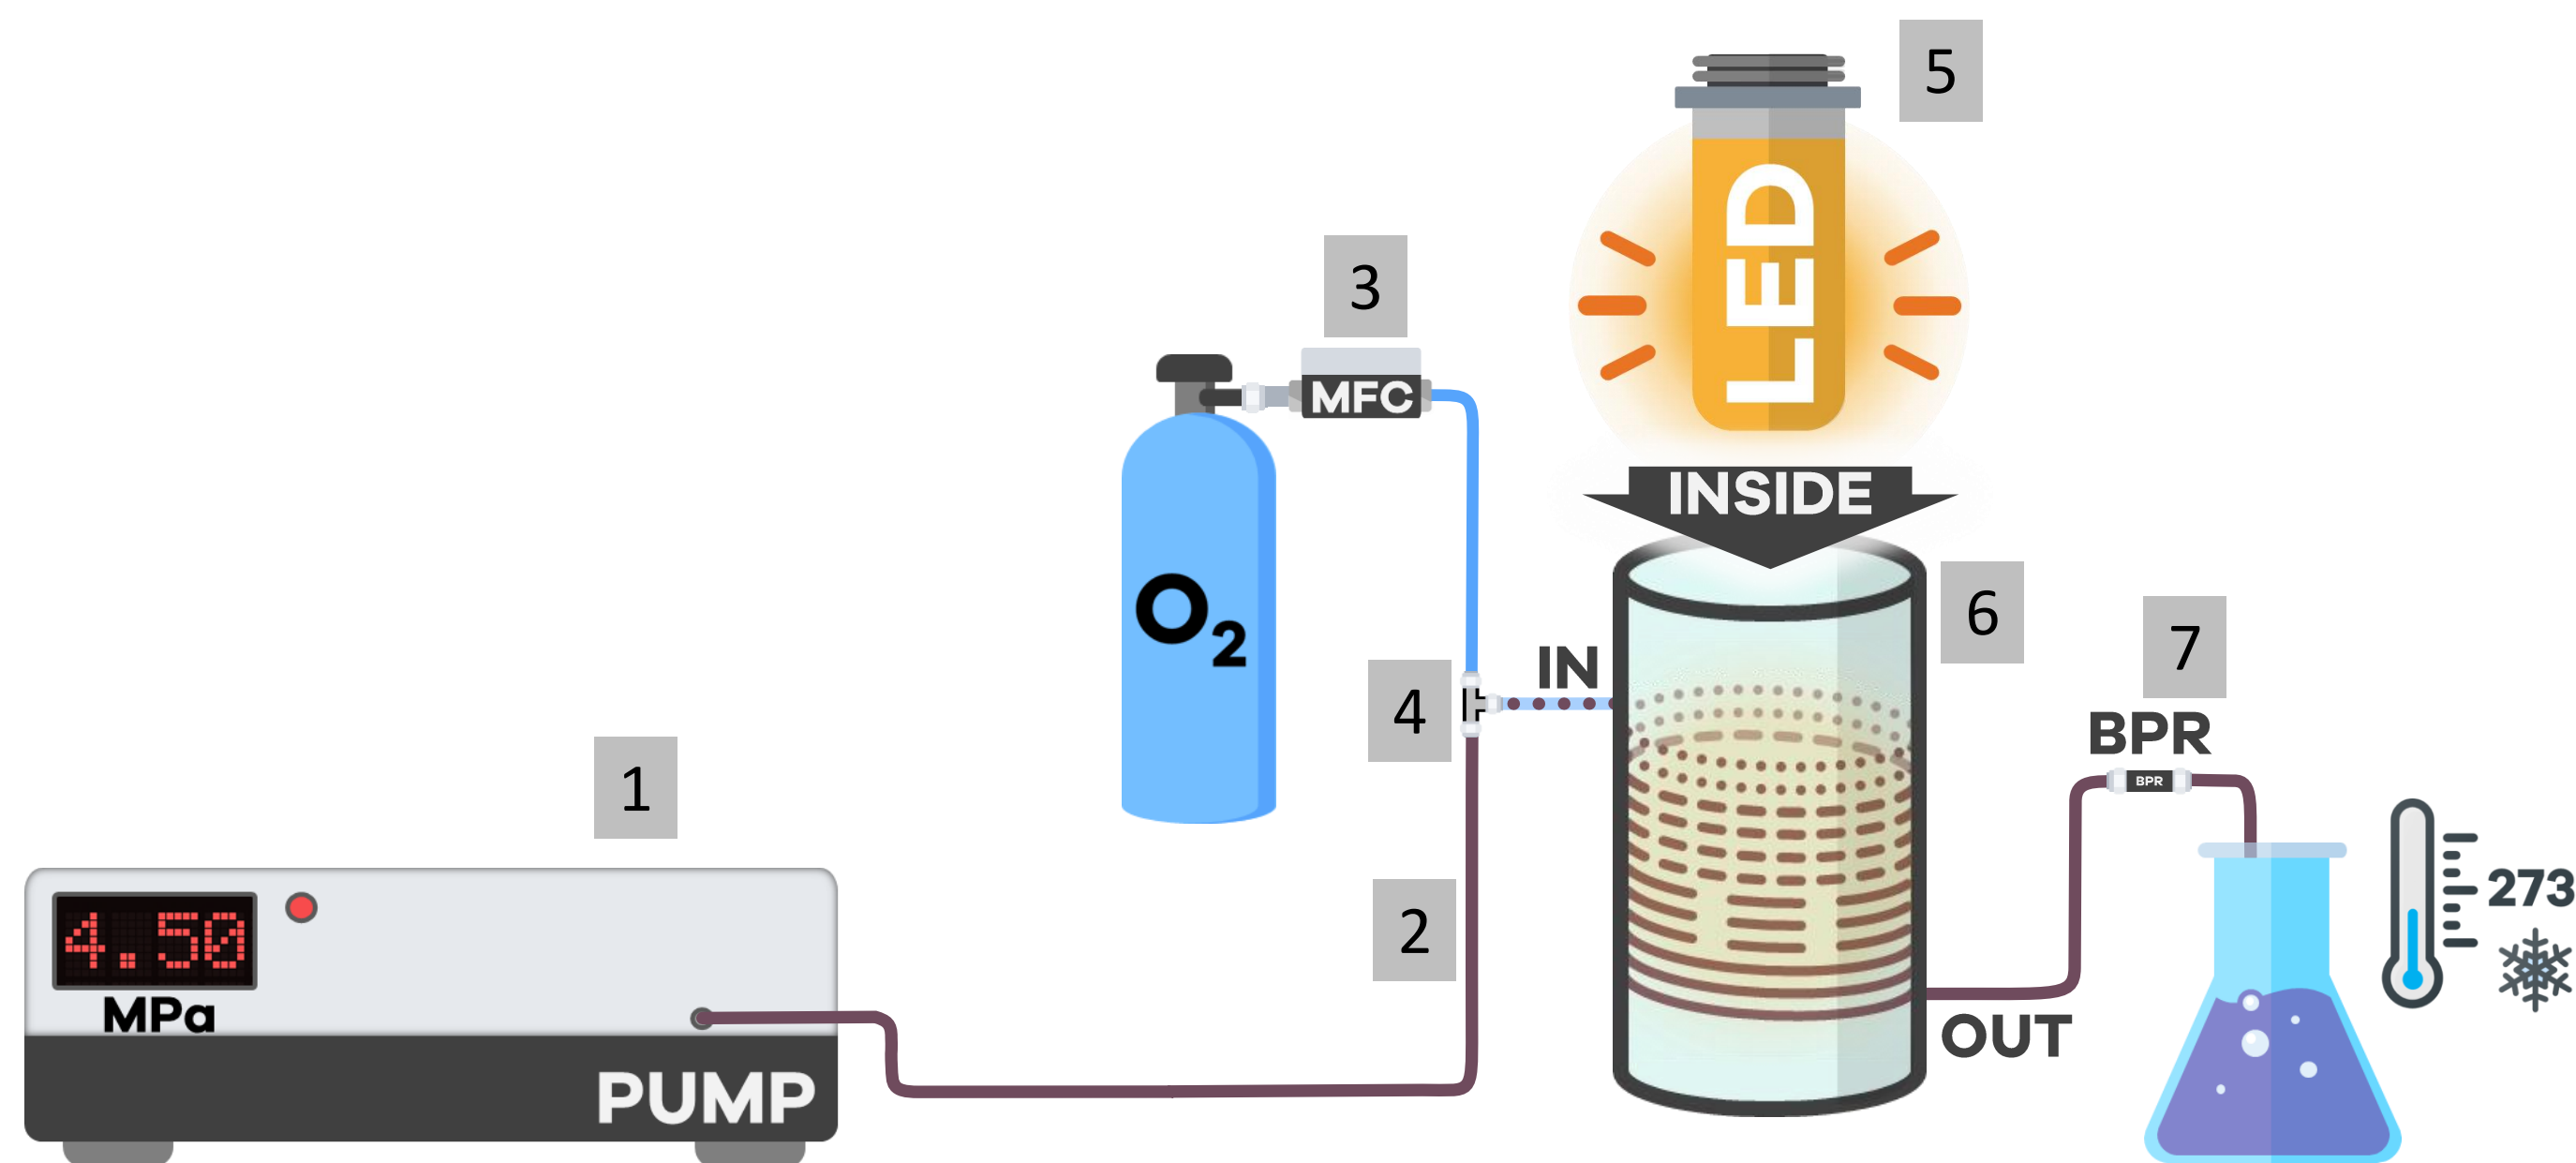

| Substrate | HPLC flow rate in mL/min | Tubing length in m |
|-----------|--------------------------|--------------------|
| 1         | 0.5                      | 12.8               |
| 3         | 0.35                     | 12.8               |
| 5         | 0.1                      | 12.8               |
| 7         | 0.2                      | 12.8               |
| 9         | 0.4                      | 12.8               |
| 11        | 0.1                      | 12.8               |
| 13        | 0.06                     | 12.8               |
| 15        | 0.15                     | 39.9               |
| 17        | 0.15                     | 39.9               |

- 1 HPLC pump: BISCHOFF 2250, 0.01-4.99 mL/min maximum flow speed. See table above for substrate flow rates.
- 2 Tubing: 1/16 inch outer diameter, 1/32 inch inner diameter: BOLA S1815-04 (FEP material) or S1811-02 (PFA, more heat resistant, more expensive)
- 3 Thermal Gas Mass Flow Controller: BROOKS INSTRUMENTS SLA5850SH1AB1C2A1
- 4 Tubing connectors: IDEX 1/16 inch connectors. Parts: P-727, F-120
- 5 LED ring light, 24 Cree MK-R warm-white LEDs, each operating at 11.6 V, 700 mA.
- 6 Glass Container, 65 mm outer diameter. Tubing (length usually 12.8 m; 31.9 m in case of substrates 15 and 17) wrapped around at the outside.
- 7 Back Pressure Regulator: IDEX U-609 housing combined with P-765 cartridge, adjusted to 45 bar (650 psi).



1

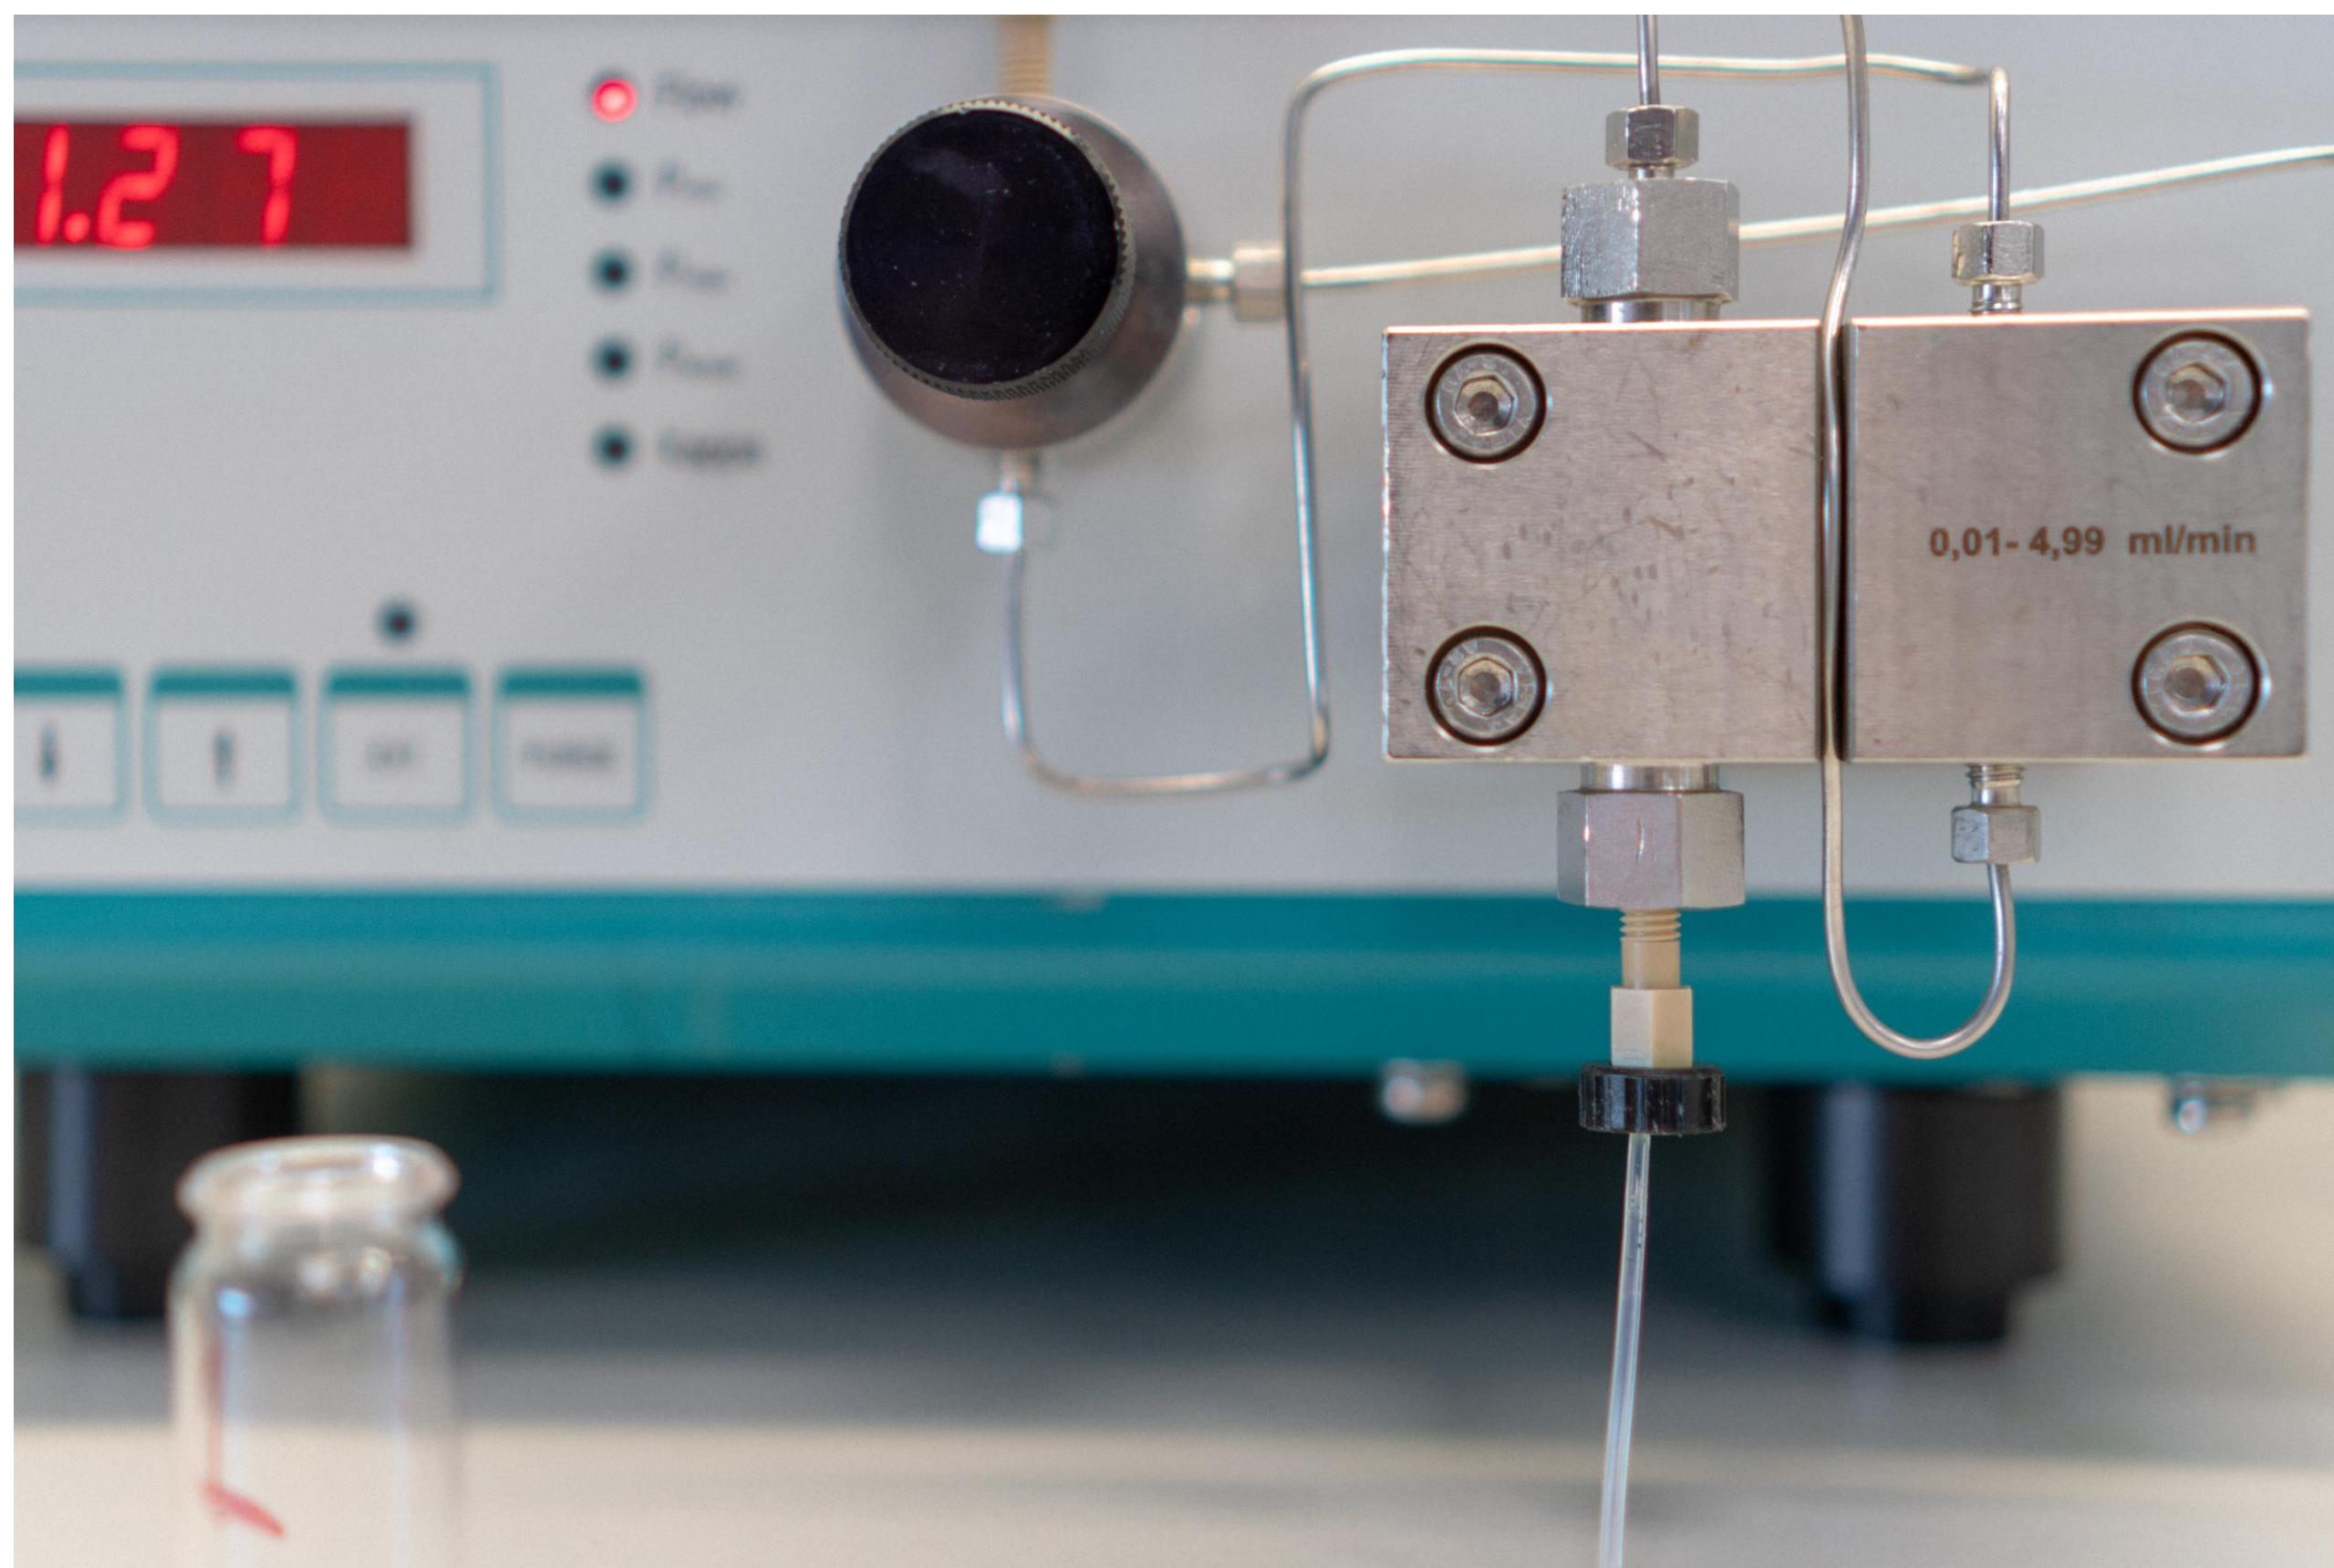



5

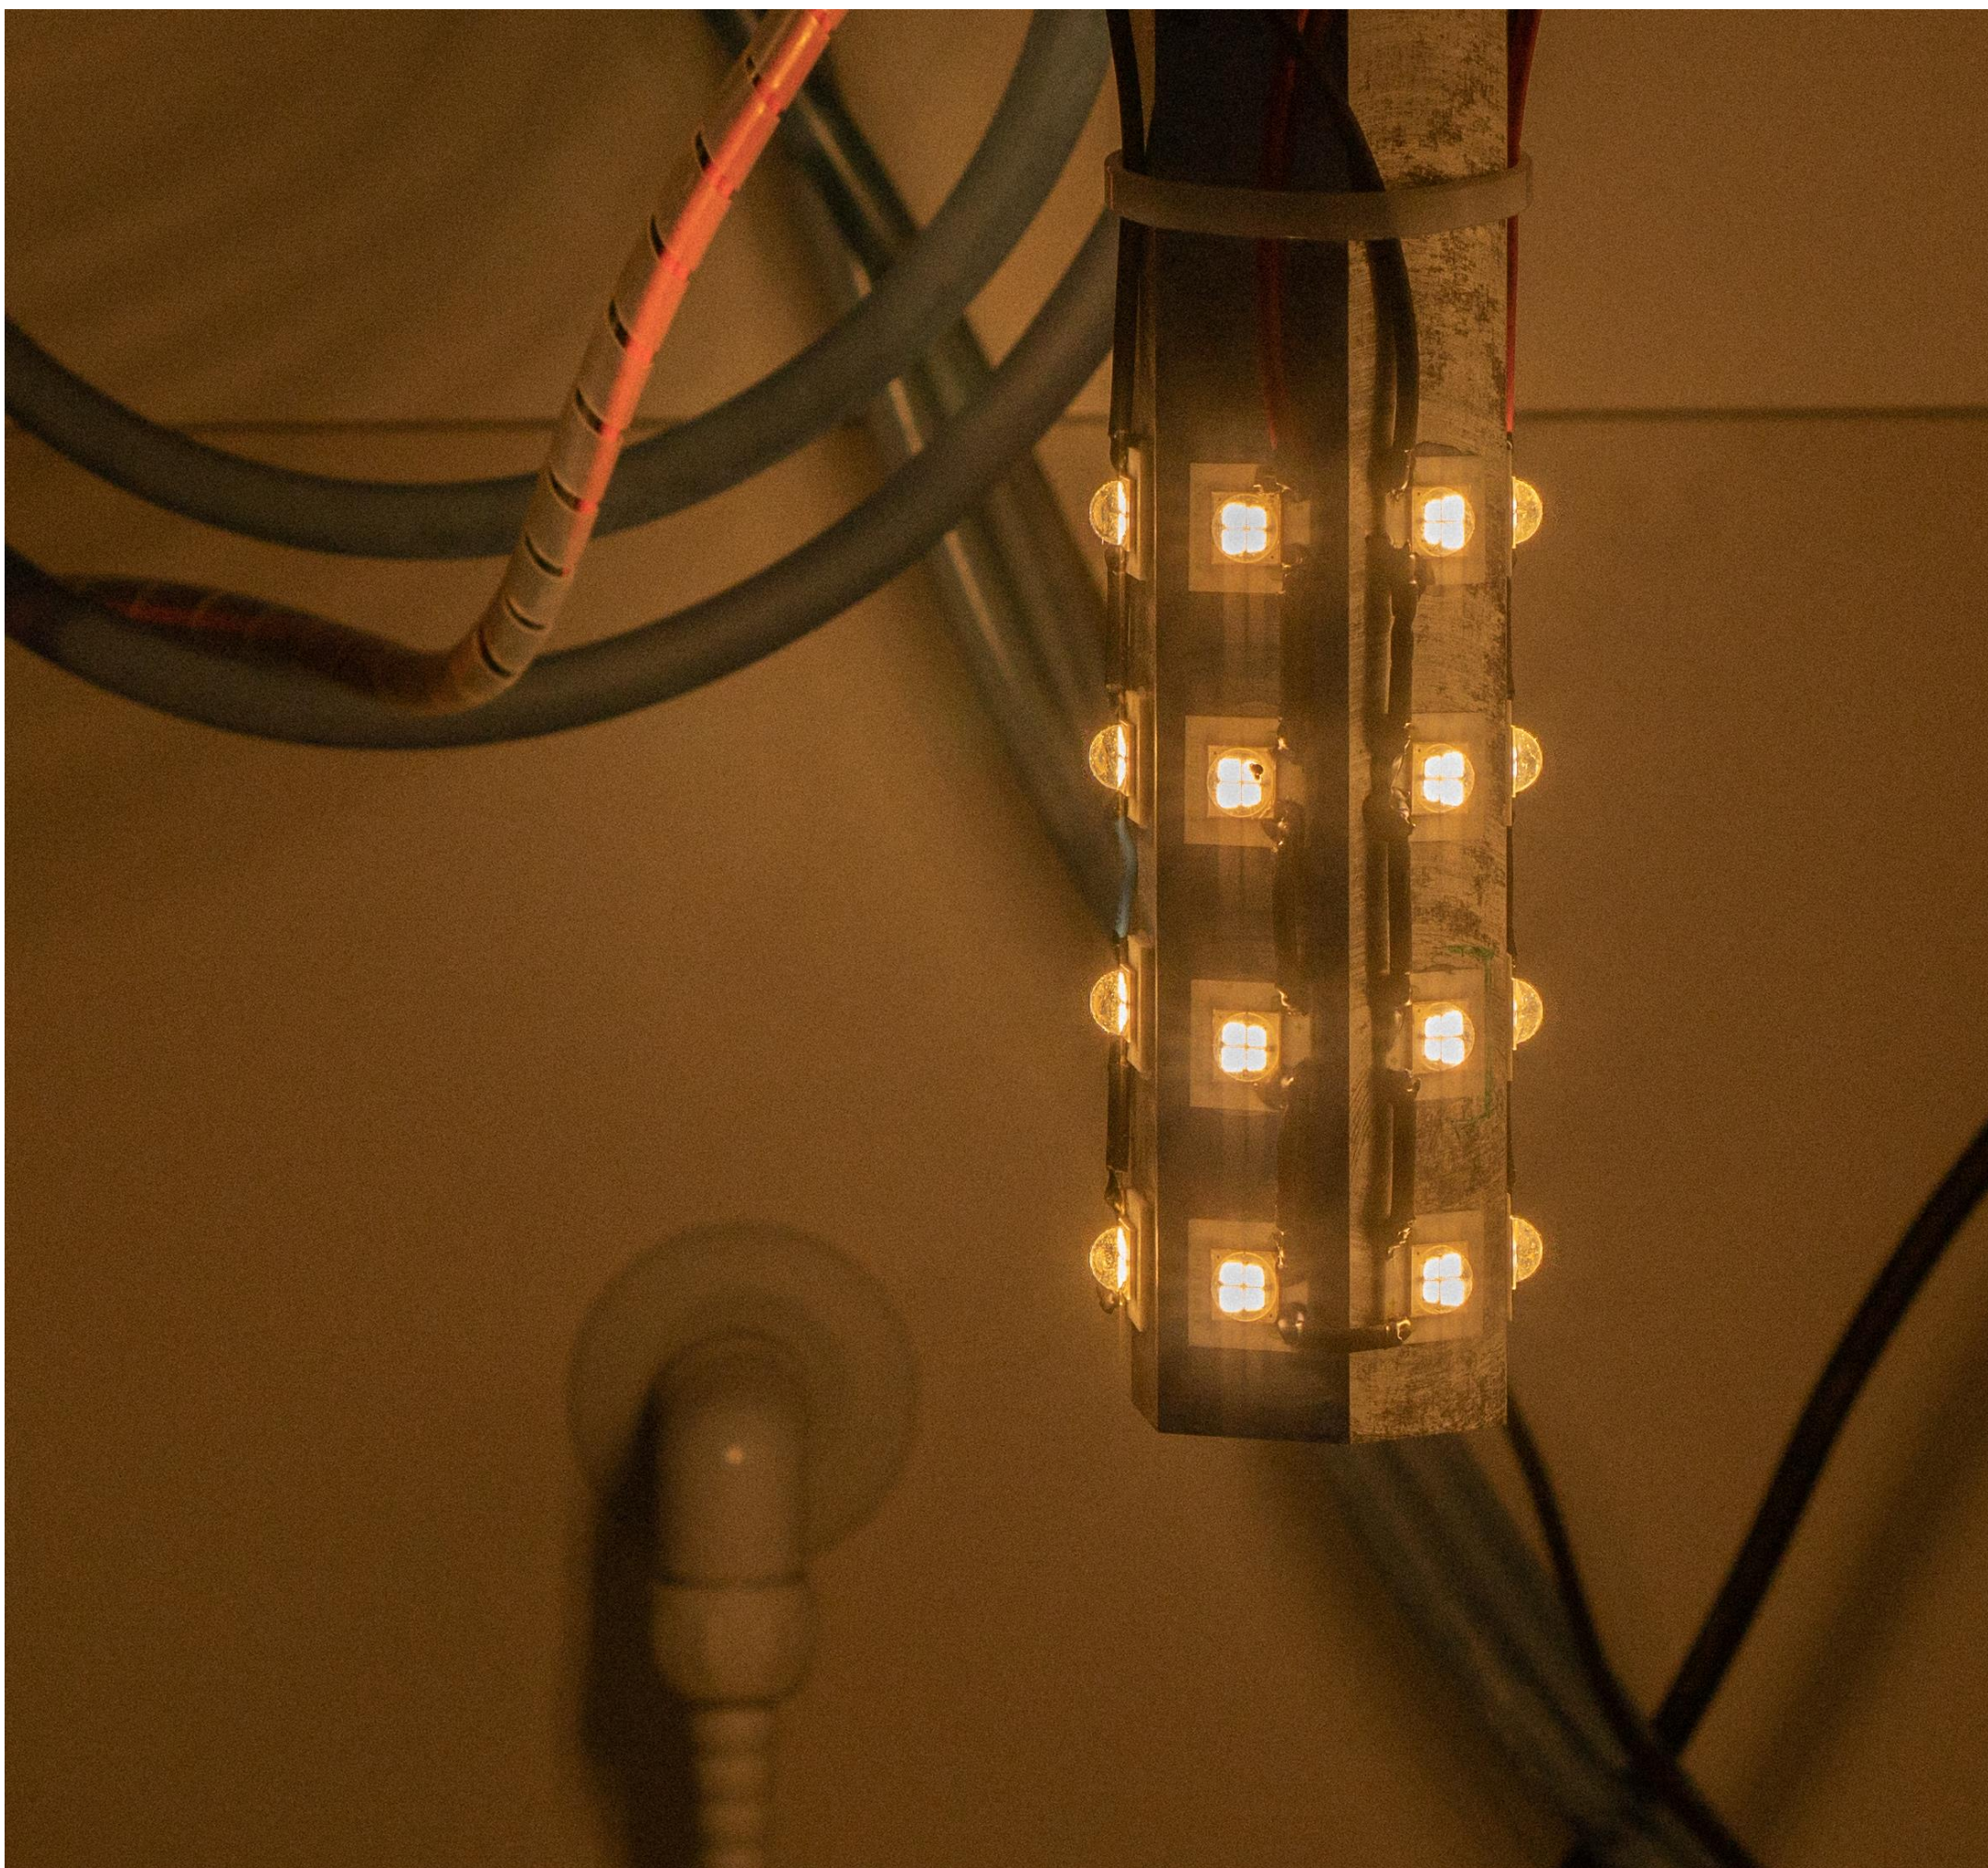



6

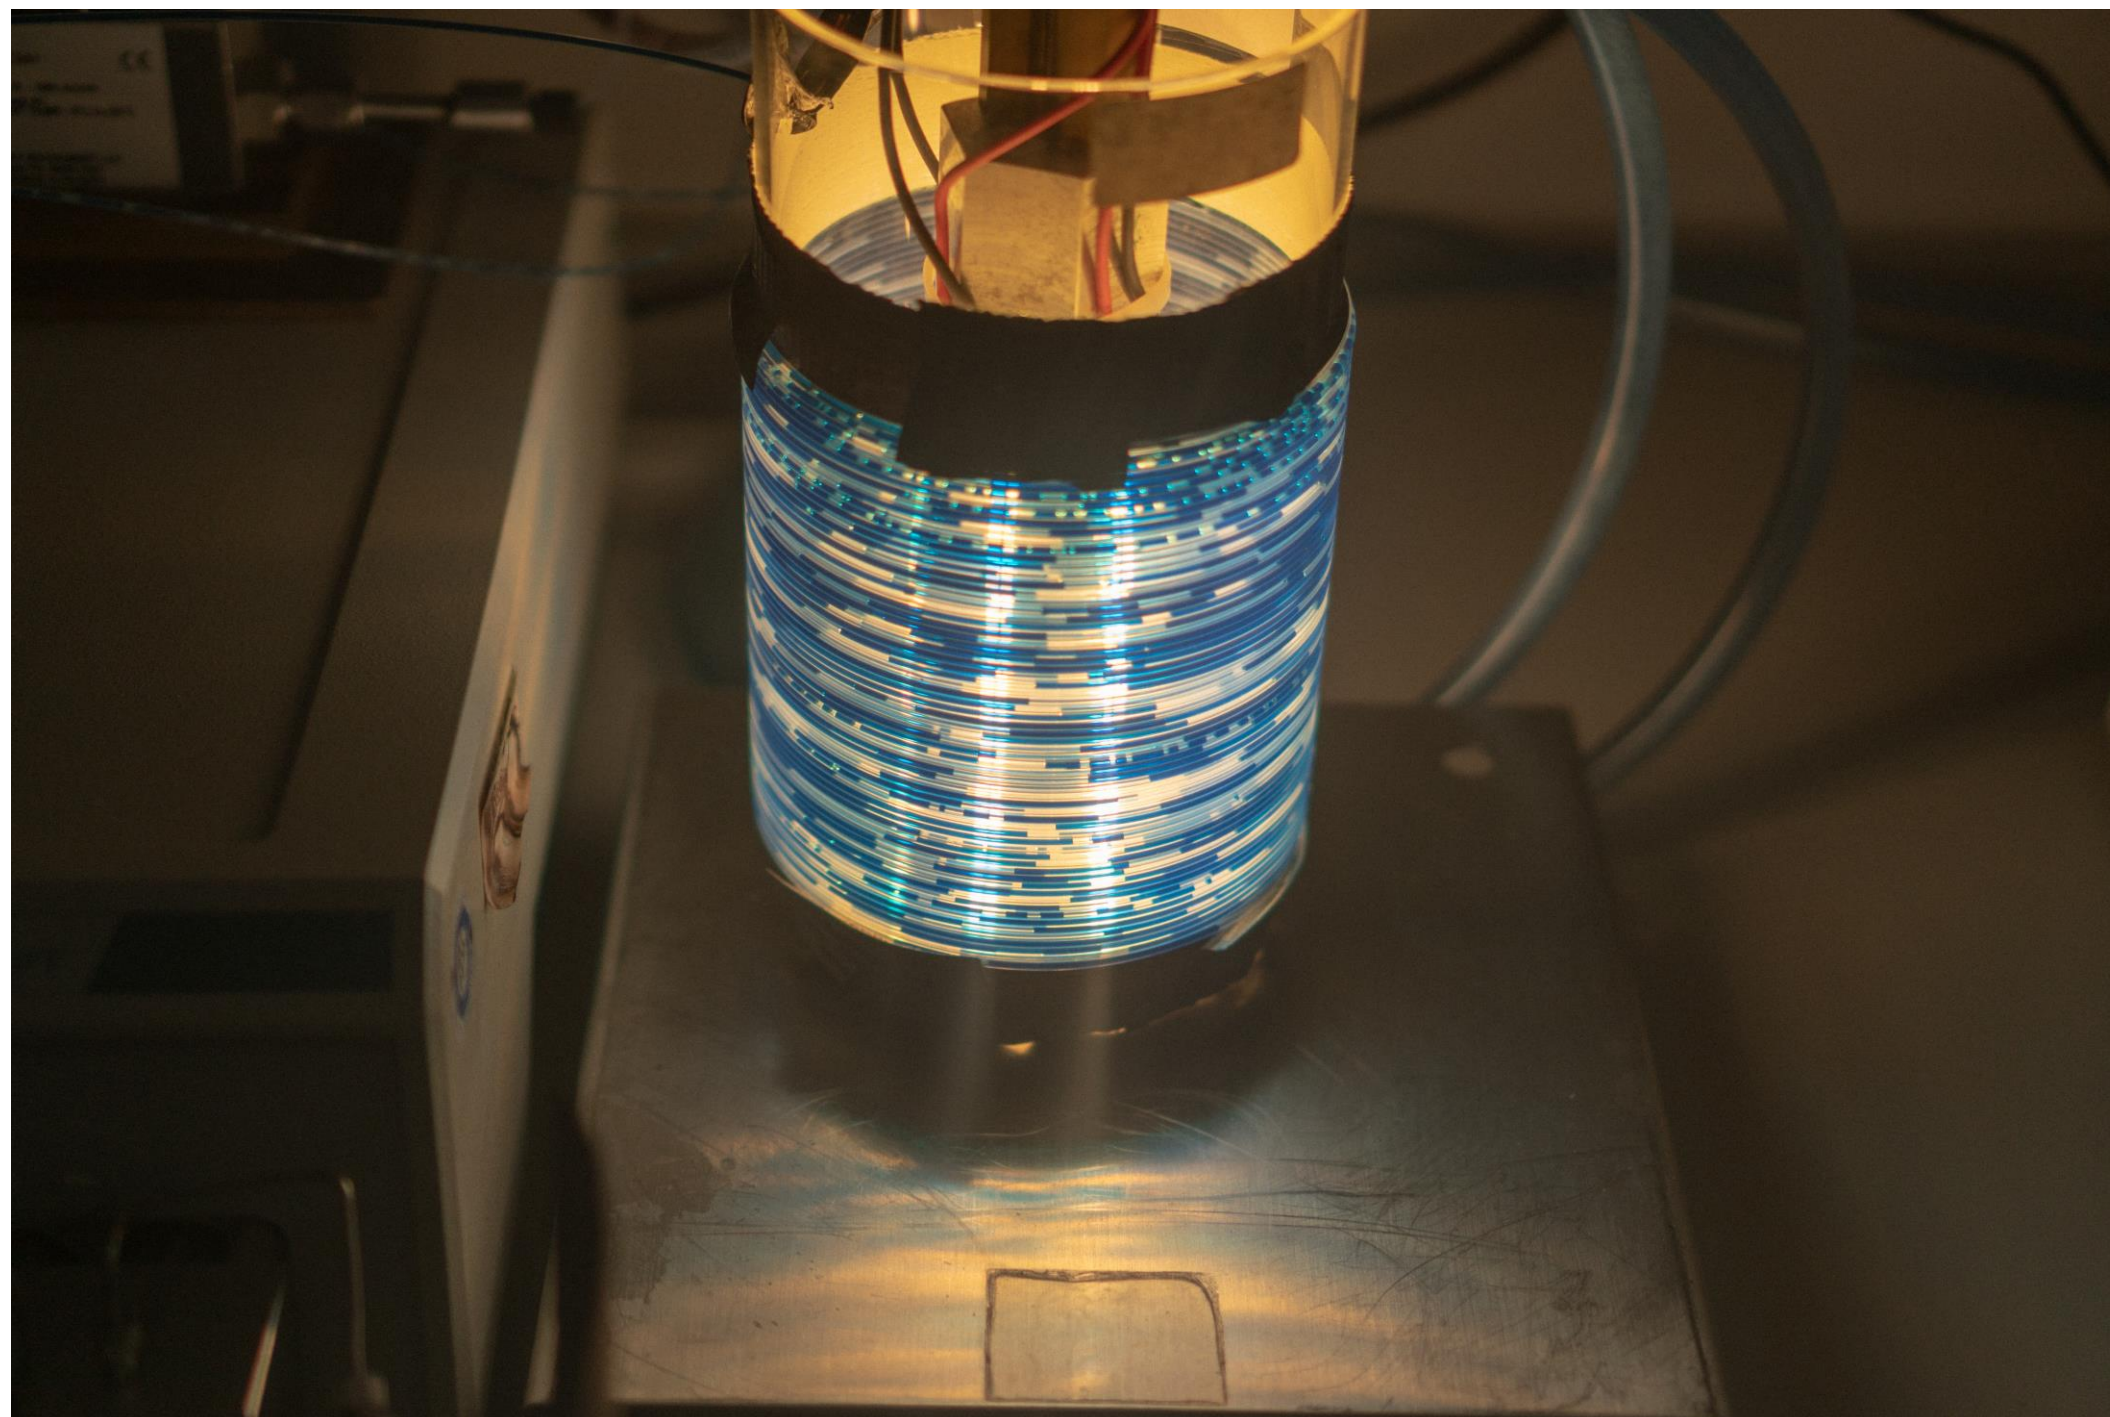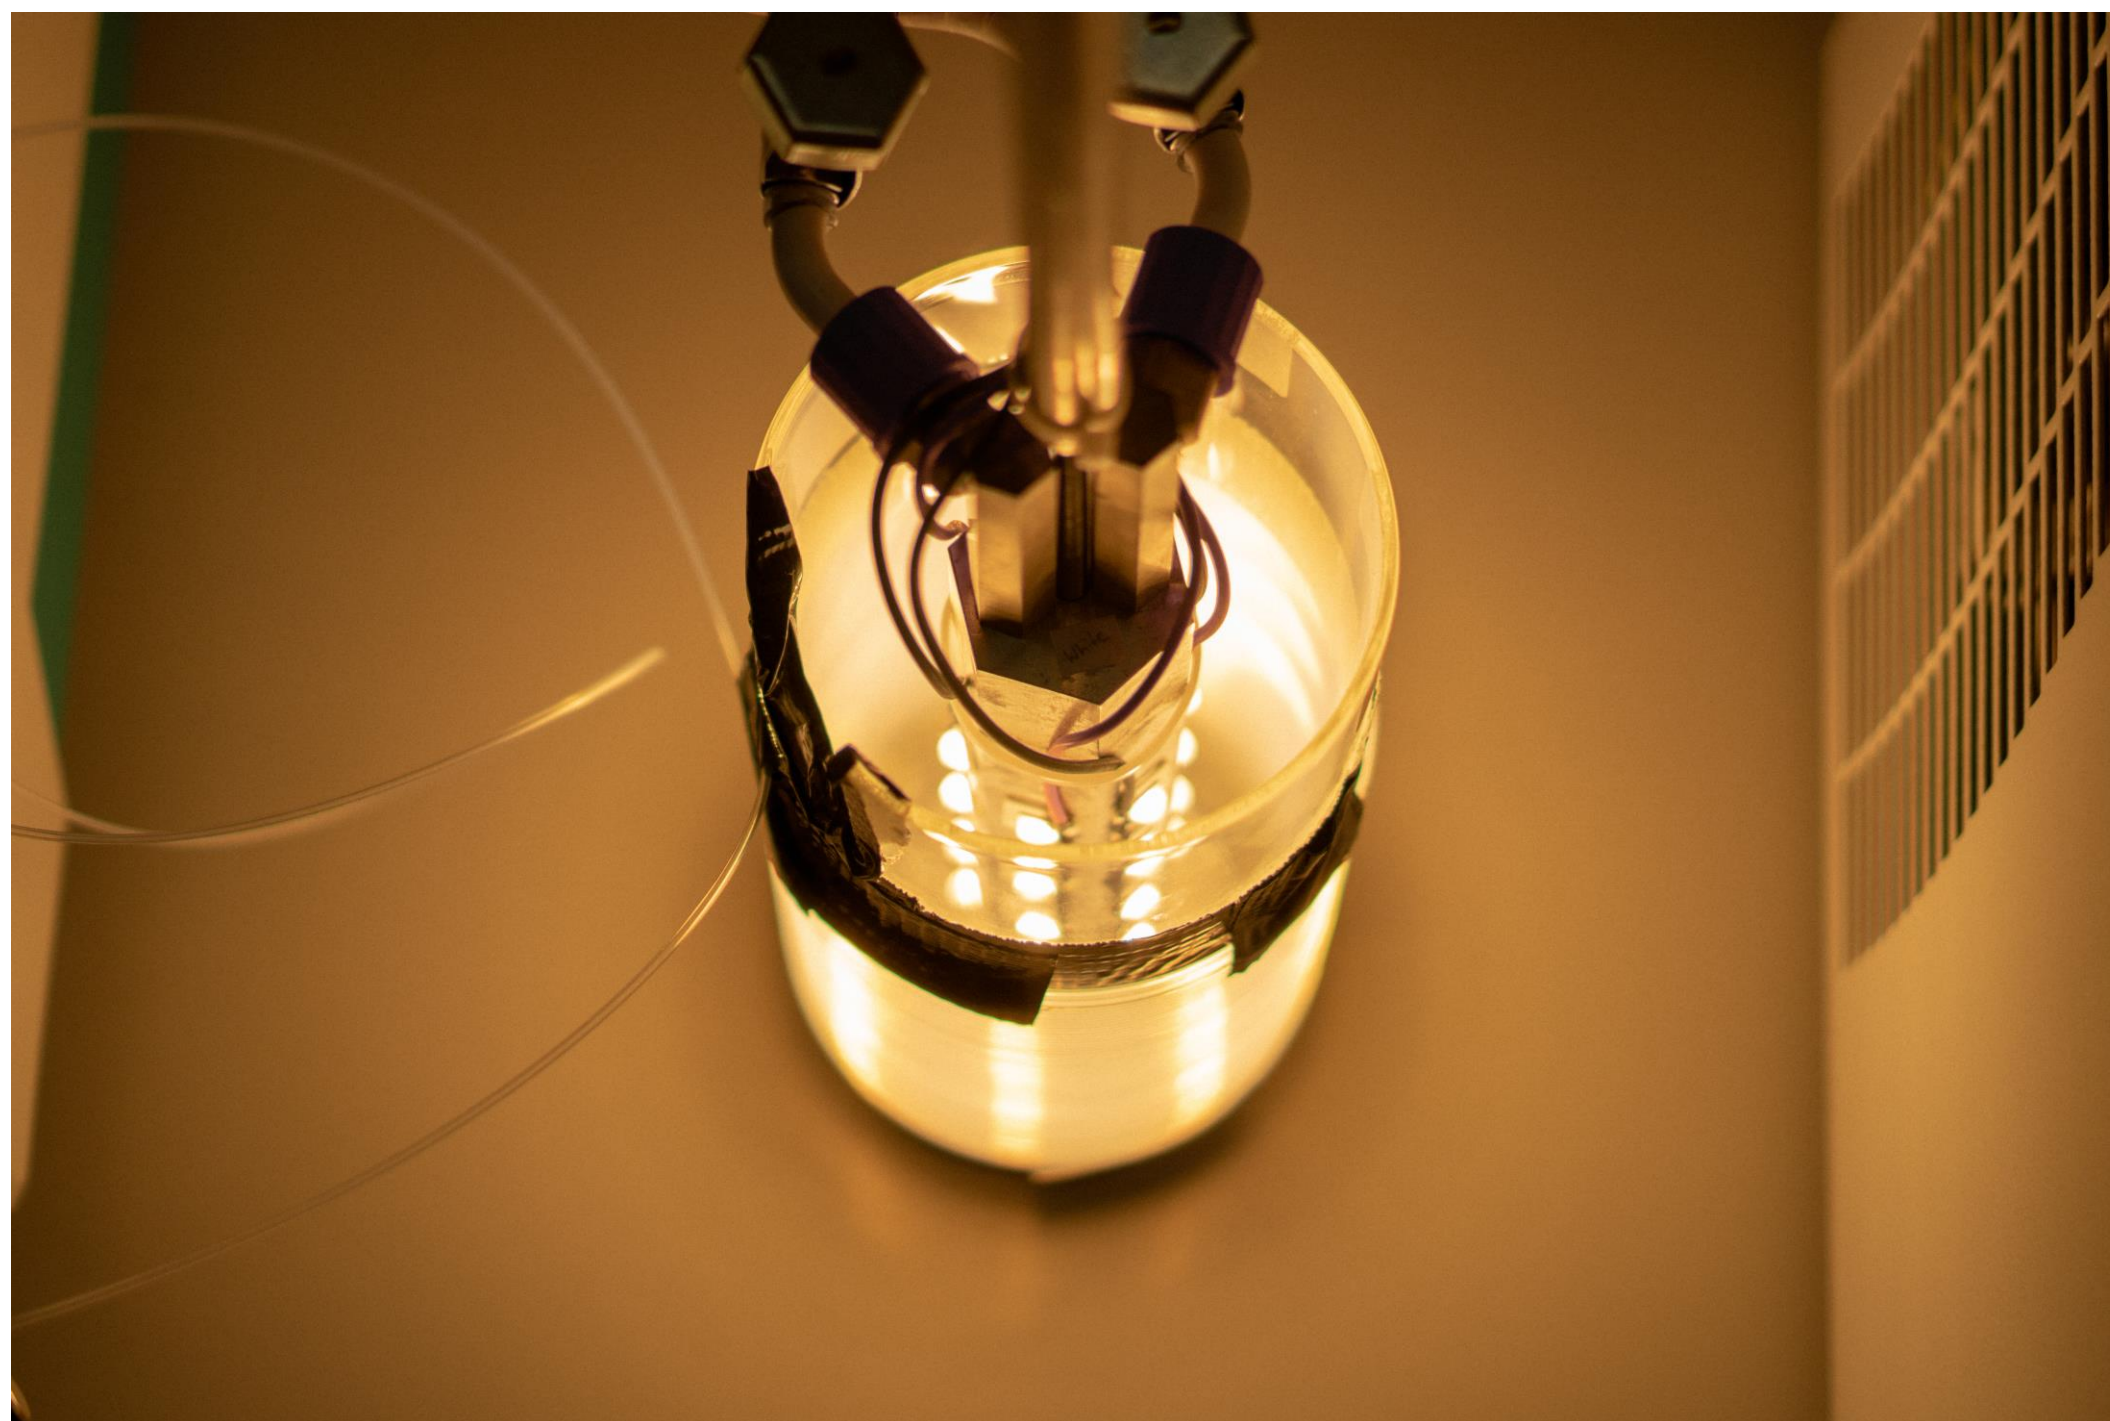



7

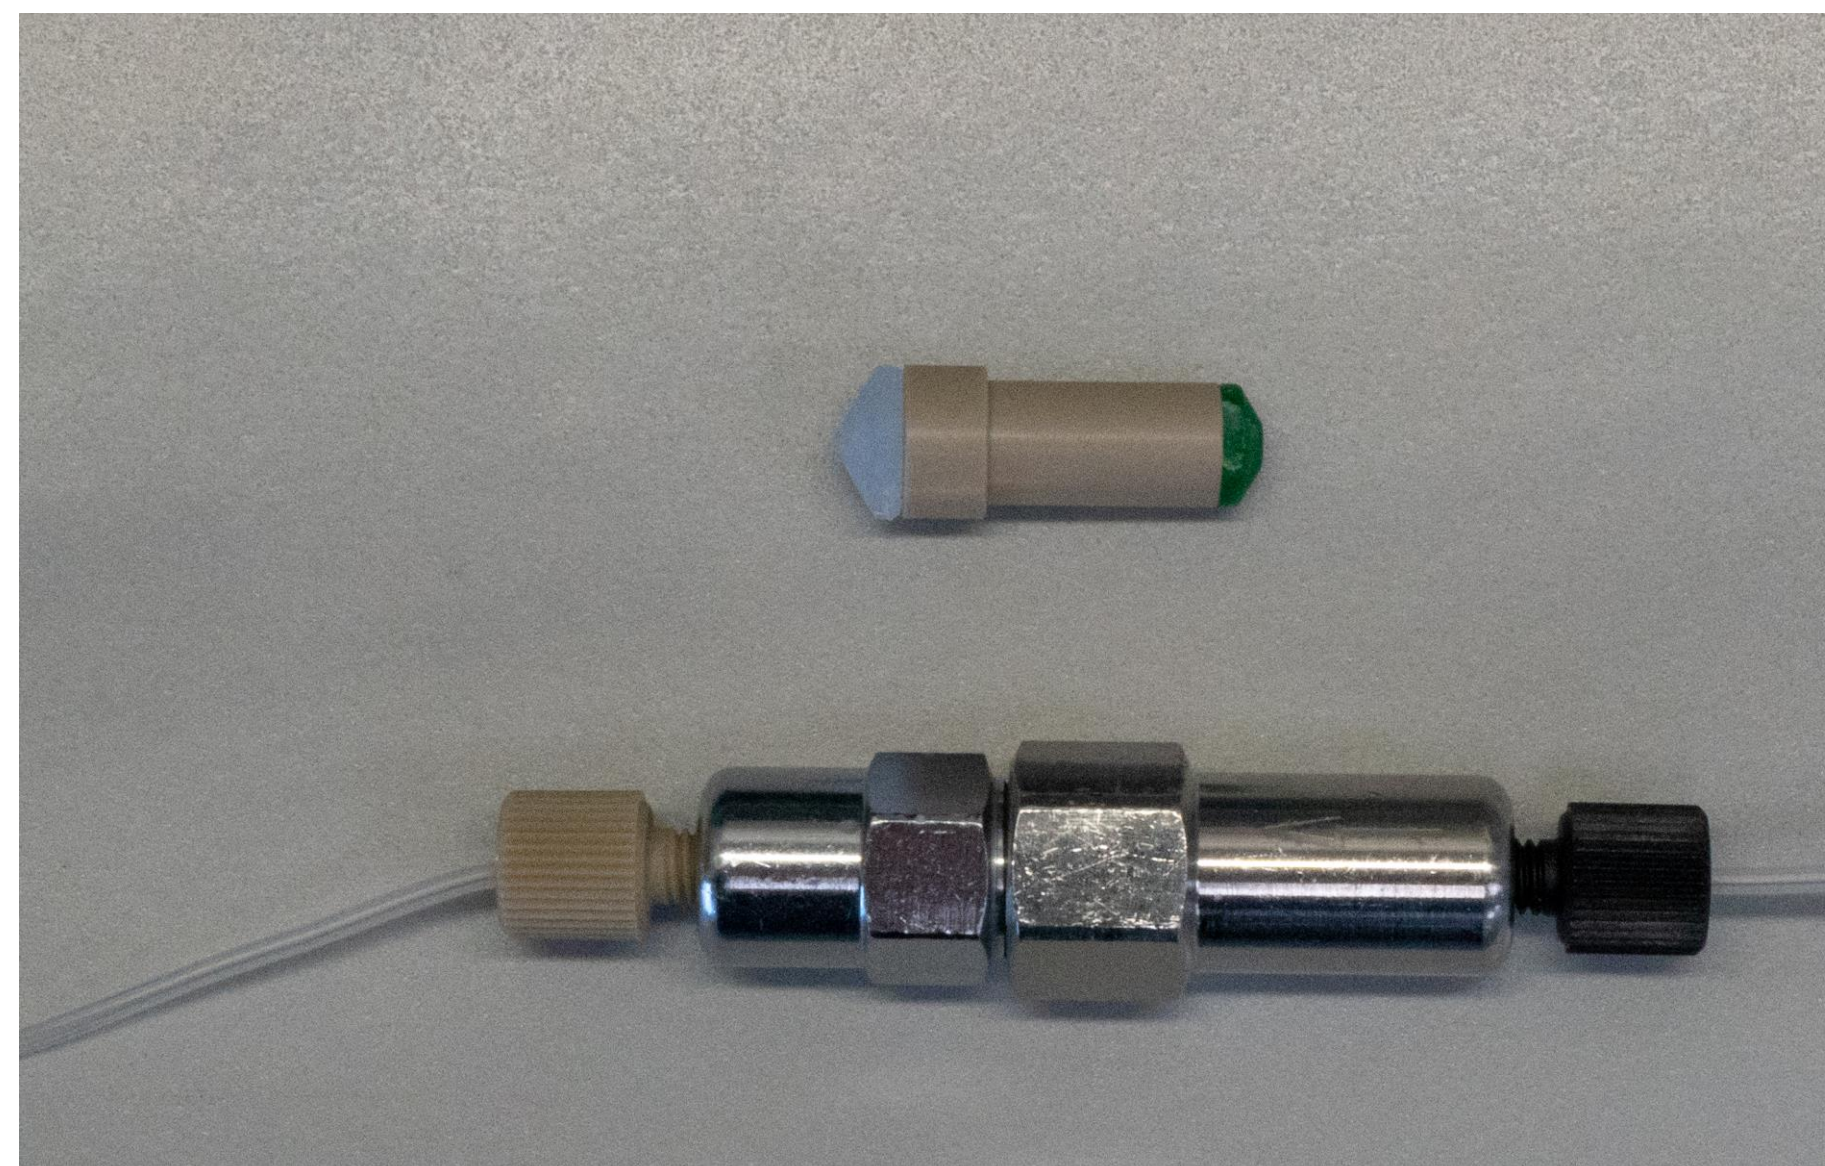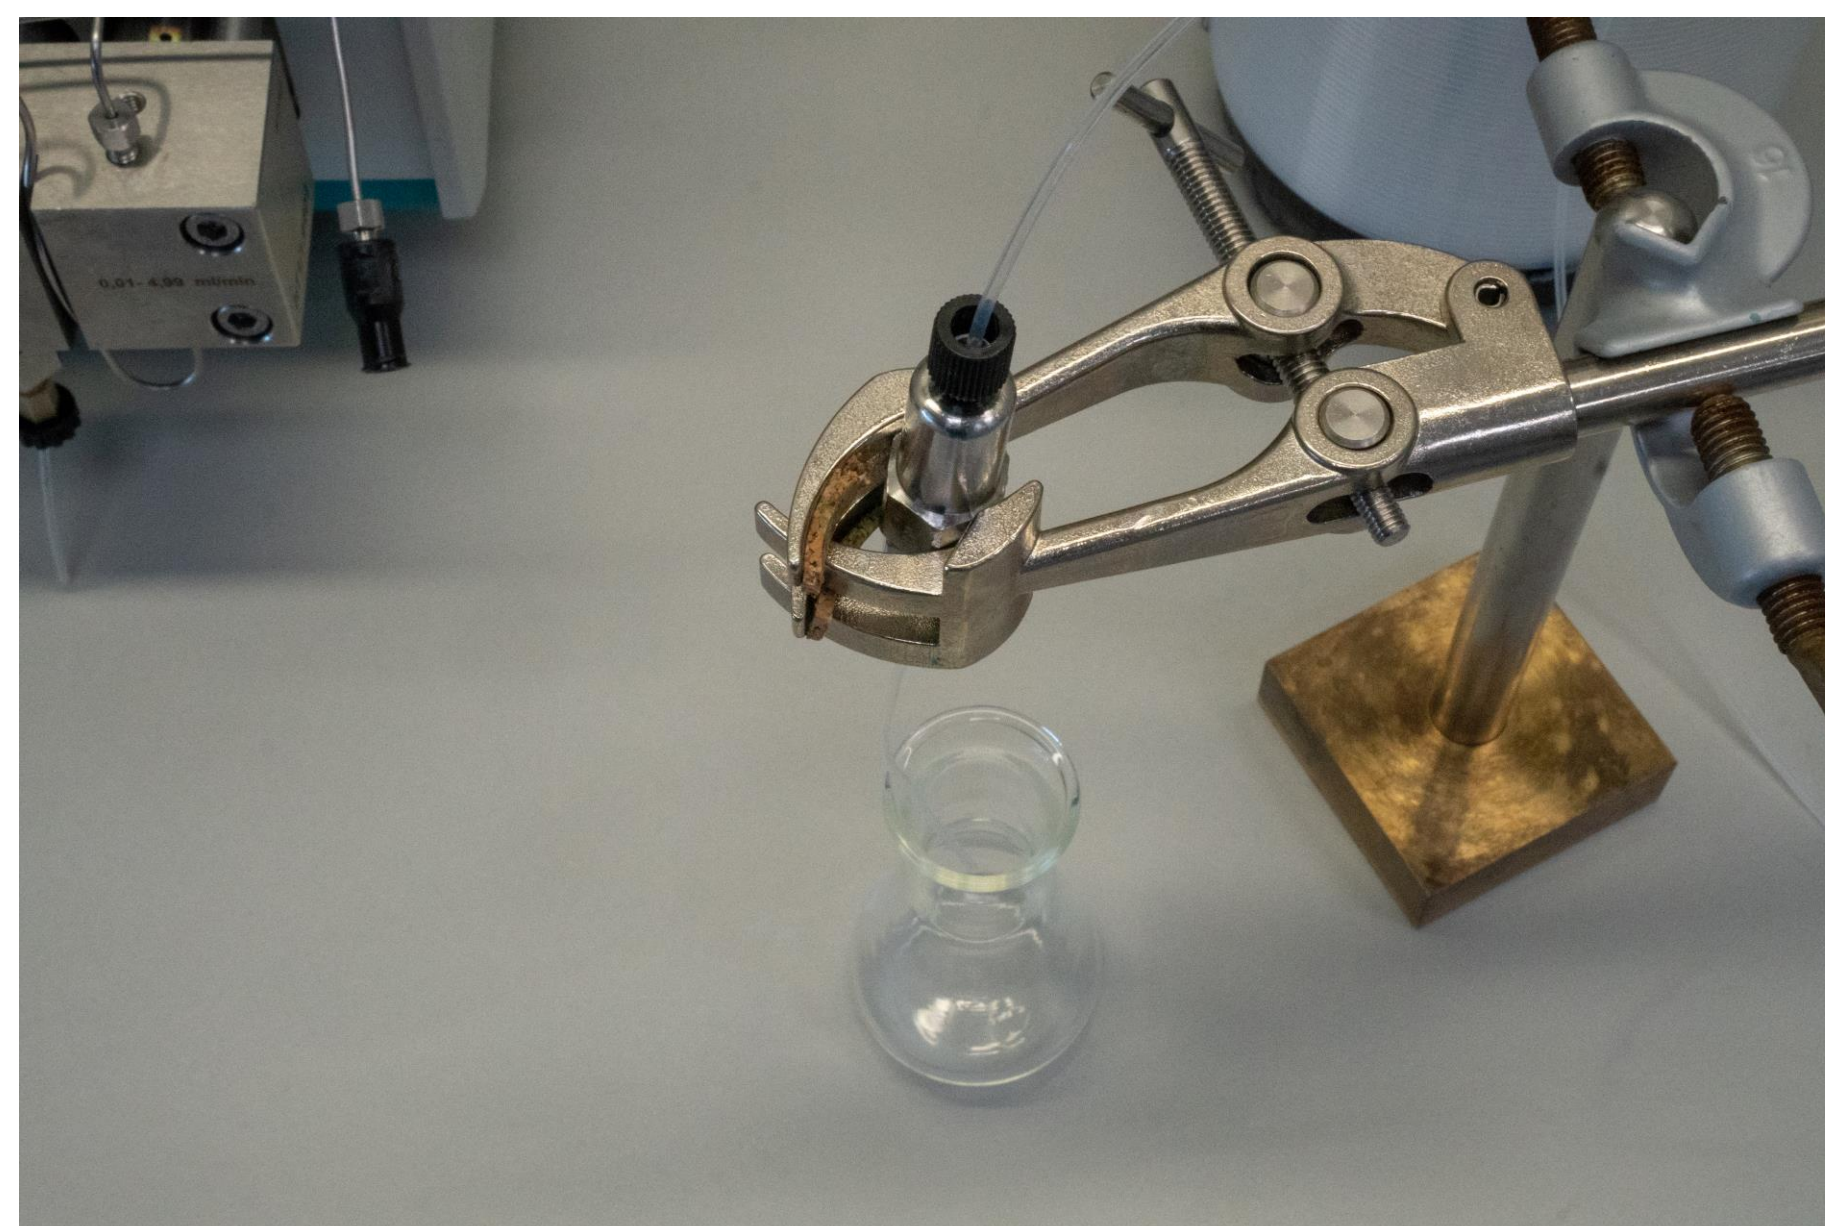

Supplement: d0gc00436g1.zip [file d0gc00436g1.zip]
